# Supplementary material
Source: PubMed Central journal article supplement (PMC3807918)
Supplement: JVI.02075-13_zjv999098267so1.pdf [file JVI.02075-13_zjv999098267so1.pdf]

Figure S1

(A) CVB5 genogroup A

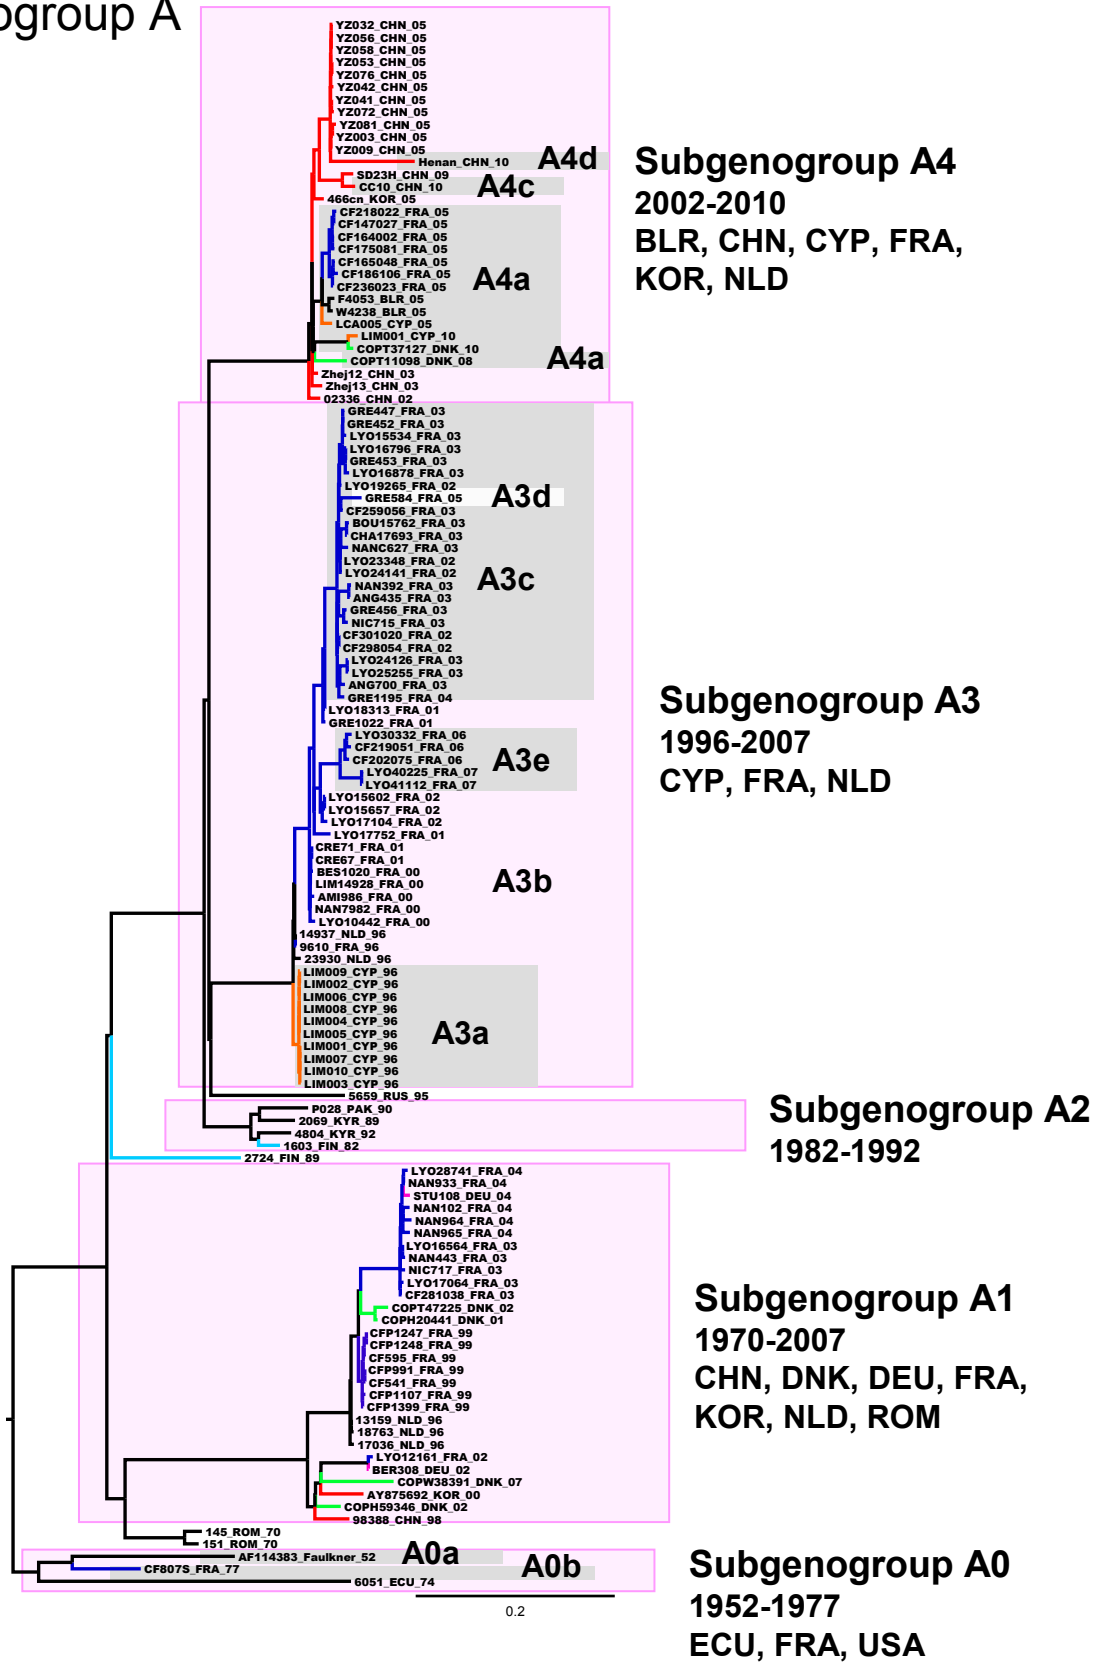

(B) CVB5 genogroup B

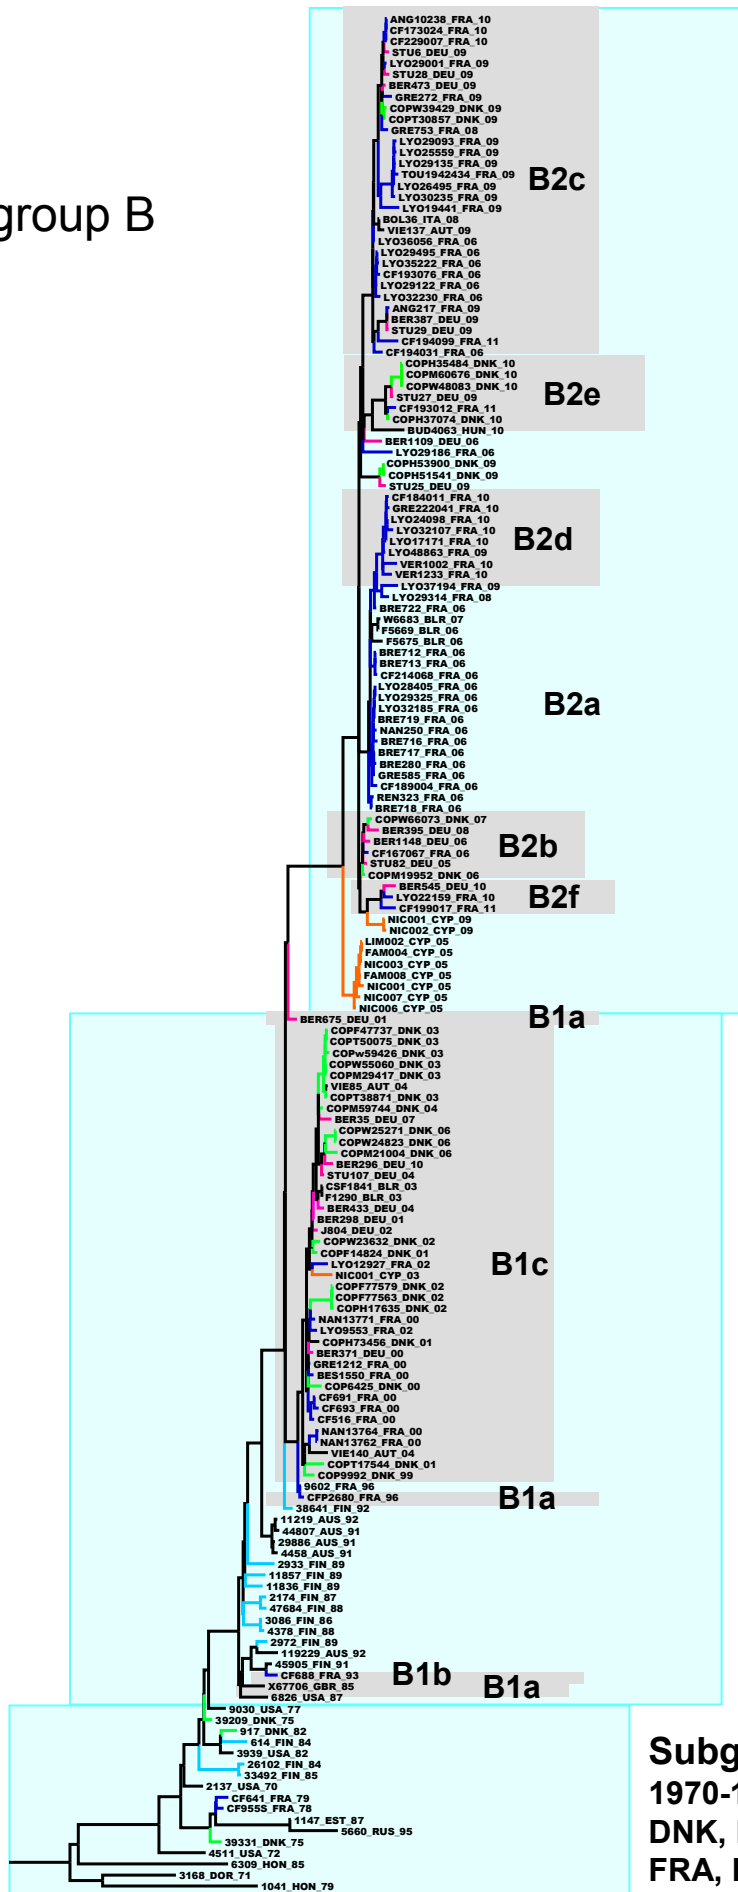

**Subgenogroup B2**  
2005-2011  
AUT, CYP, DEU, DNK,  
FRA, ITA, HUN

**Subgenogroup B1**  
1985-2010  
AUS, AUT, BLR, CYP,  
DEU, DNK, GBR, FRA

**Subgenogroup B0**  
1970-1995  
DNK, DOR, EST, FIN,  
FRA, HON, RUS, USA

**FIG S1 Phylogenetic tree inferred with the CVB5 1DVP1 gene, labeled with virus strains designations.**

**(A)** MCC tree showing the phylogram corresponding to the genealogy of the CVB5 genogroup A. The topology shown is the maximum clade credibility (MCC) tree reconstructed with the 1DVP1 gene sequences (849 nt) and generated by the Markov chain Monte Carlo (MCMC) procedure implemented in the software program BEAST (34). The branches are drawn to the indicated scale (nt substitutions per site). Consistent nodes are labeled for the main lineages with asterisks indicating posterior probabilities >0.9. Bootstrap values estimated in a maximum likelihood analysis (not shown) are also indicated: full circles indicate bootstrap values >0.9 and open circles indicate bootstrap values ranging between 0.8 and 0.9. The temporal samplings of the CVB5 strains are indicated for each subgenogroup on the MCC tree. Colors (see Fig. 1) show the locations where it was sampled. **(B)** MCC tree showing the phylogram corresponding to the genealogy of the CVB5 genogroup B. See the legend to figure S1A for other information.





**FIG S2 Distribution of clinical samples in the phylogenetic tree inferred with the CVB5 1DVP1 gene.**

Each virus sequence is represented by its tissue origin (see caption table). **(A)** MCC tree showing the phylogram corresponding to the genealogy of the CVB5 genogroup A. The topology shown is the maximum clade credibility (MCC) tree reconstructed with the 1DVP1 gene sequences (849 nt) and generated by the Markov chain Monte Carlo (MCMC) procedure implemented in the software program BEAST (**34**). Samples are explicitly dated on the x-axis. The genealogy is represented so that lineages that leave more descendants are placed upward. This sorting places the trunk along a raw diagonal. Consistent nodes are labeled for the main lineages with full circles indicating posterior probabilities >0.9. **(B)** MCC tree showing the phylogram corresponding to the genealogy of the CVB5 genogroup B. See the legend to figure S2A for other information.

**TABLE S1 Sequences of human coxsackievirus B5 strains sampled in European countries used in this study**

| Strain name        | Isolation source     | Country | Geographic area  | Collection date |    | Gene | Peptide | Function       | Length (nt) | Accession number |
|--------------------|----------------------|---------|------------------|-----------------|----|------|---------|----------------|-------------|------------------|
| CF641_FRA_79       | Feces                | France  | Clermont-Ferrand | 1979            | 1D | VP1  |         | Capsid protein | 849         | HF948115         |
| CF991P_FRA_99      | Throat               | France  | Clermont-Ferrand | 1999            | 1D | VP1  |         | Capsid protein | 849         | HF948116         |
| CF1247P_FRA_99     | Throat               | France  | Clermont-Ferrand | 1999            | 1D | VP1  |         | Capsid protein | 849         | HF948117         |
| CF1248P_FRA_99     | Vesicular fluid      | France  | Clermont-Ferrand | 1999            | 1D | VP1  |         | Capsid protein | 849         | HF948118         |
| CF1399P_FRA_99     | Throat               | France  | Clermont-Ferrand | 1999            | 1D | VP1  |         | Capsid protein | 849         | HF948119         |
| CF541_FRA_99       | Feces                | France  | Clermont-Ferrand | 1999            | 1D | VP1  |         | Capsid protein | 849         | HF948120         |
| CF595_FRA_99       | Feces                | France  | Clermont-Ferrand | 1999            | 1D | VP1  |         | Capsid protein | 849         | HF948121         |
| CF691_FRA_00       | Feces                | France  | Clermont-Ferrand | 2000            | 1D | VP1  |         | Capsid protein | 849         | HF948122         |
| CF693_FRA_00       | Feces                | France  | Clermont-Ferrand | 2000            | 1D | VP1  |         | Capsid protein | 849         | HF948123         |
| CF298054_FRA_02    | Feces                | France  | Clermont-Ferrand | 2002            | 1D | VP1  |         | Capsid protein | 849         | HF948124         |
| CF301020_FRA_02    | Feces                | France  | Clermont-Ferrand | 2002            | 1D | VP1  |         | Capsid protein | 849         | HF948125         |
| CF259056_FRA_03    | Feces                | France  | Clermont-Ferrand | 2003            | 1D | VP1  |         | Capsid protein | 849         | HF948126         |
| CF281038_FRA_03    | Throat               | France  | Clermont-Ferrand | 2003            | 1D | VP1  |         | Capsid protein | 849         | HF948127         |
| CF218022CSF_FRA_05 | Cerebrospinal fluid  | France  | Clermont-Ferrand | 2005            | 1D | VP1  |         | Capsid protein | 849         | HF948128         |
| CF175089CSF_FRA_05 | Cerebrospinal fluid  | France  | Clermont-Ferrand | 2005            | 1D | VP1  |         | Capsid protein | 849         | HF948129         |
| CF164002_FRA_05    | Feces                | France  | Clermont-Ferrand | 2005            | 1D | VP1  |         | Capsid protein | 849         | HF948130         |
| CF165048_FRA_05    | Feces                | France  | Clermont-Ferrand | 2005            | 1D | VP1  |         | Capsid protein | 849         | HF948131         |
| CF186106_FRA_05    | Throat               | France  | Clermont-Ferrand | 2005            | 1D | VP1  |         | Capsid protein | 849         | HF948132         |
| CF216024CSF_FRA_06 | Cerebrospinal fluid  | France  | Clermont-Ferrand | 2006            | 1D | VP1  |         | Capsid protein | 849         | HF948133         |
| CF194031CSF_FRA_06 | Cerebrospinal fluid  | France  | Clermont-Ferrand | 2006            | 1D | VP1  |         | Capsid protein | 849         | HF948134         |
| CF193076CSF_FRA_06 | Cerebrospinal fluid  | France  | Clermont-Ferrand | 2006            | 1D | VP1  |         | Capsid protein | 849         | HF948135         |
| CF189004CSF_FRA_06 | Cerebrospinal fluid  | France  | Clermont-Ferrand | 2006            | 1D | VP1  |         | Capsid protein | 849         | HF948136         |
| CF173024CSF_FRA_10 | Cerebrospinal fluid  | France  | Clermont-Ferrand | 2010            | 1D | VP1  |         | Capsid protein | 849         | HF948137         |
| CF184011CSF_FRA_10 | Cerebrospinal fluid  | France  | Clermont-Ferrand | 2010            | 1D | VP1  |         | Capsid protein | 849         | HF948138         |
| CF229007_FRA_10    | Throat               | France  | Clermont-Ferrand | 2010            | 1D | VP1  |         | Capsid protein | 849         | HF948139         |
| CF193012_FRA_11    | Throat               | France  | Clermont-Ferrand | 2011            | 1D | VP1  |         | Capsid protein | 849         | HF948140         |
| VER1233_FRA_10     | Cerebrospinal fluid  | France  | Versailles       | 2010            | 1D | VP1  |         | Capsid protein | 849         | HF948141         |
| LYO10442_FRA_00    | Bronchial aspiration | France  | Lyon             | 2000            | 1D | VP1  |         | Capsid protein | 849         | HF948142         |
| NAN13764_FRA_00    | Cerebrospinal fluid  | France  | Nancy            | 2000            | 1D | VP1  |         | Capsid protein | 849         | HF948143         |
| NAN13762_FRA_00    | Cerebrospinal fluid  | France  | Nancy            | 2000            | 1D | VP1  |         | Capsid protein | 849         | HF948144         |
| NAN13771_FRA_00    | Cerebrospinal fluid  | France  | Nancy            | 2000            | 1D | VP1  |         | Capsid protein | 849         | HF948145         |
| LIM14928_FRA_00    | Cerebrospinal fluid  | France  | Limoge           | 2000            | 1D | VP1  |         | Capsid protein | 849         | HF948146         |
| AMI986_FRA_00      | Throat               | France  | Amiens           | 2000            | 1D | VP1  |         | Capsid protein | 849         | HF948147         |
| GRE1212_FRA_00     | Feces                | France  | Grenoble         | 2000            | 1D | VP1  |         | Capsid protein | 849         | HF948148         |
| BES1550_FRA_00     | Throat               | France  | Besançon         | 2000            | 1D | VP1  |         | Capsid protein | 849         | HF948149         |
| LYO17752_FRA_01    | Feces                | France  | Lyon             | 2001            | 1D | VP1  |         | Capsid protein | 849         | HF948150         |
| LYO18313_FRA_01    | Throat               | France  | Lyon             | 2001            | 1D | VP1  |         | Capsid protein | 849         | HF948151         |
| CRE67_FRA_01       | Cerebrospinal fluid  | France  | Créteil          | 2001            | 1D | VP1  |         | Capsid protein | 849         | HF948152         |
| CRE71_FRA_01       | Cerebrospinal fluid  | France  | Créteil          | 2001            | 1D | VP1  |         | Capsid protein | 849         | HF948153         |
| LYO9553_FRA_02     | Throat               | France  | Lyon             | 2002            | 1D | VP1  |         | Capsid protein | 849         | HF948154         |
| LYO12161_FRA_02    | Throat               | France  | Lyon             | 2002            | 1D | VP1  |         | Capsid protein | 849         | HF948155         |

|                 |                         |        |                 |      |    |     |                |     |          |
|-----------------|-------------------------|--------|-----------------|------|----|-----|----------------|-----|----------|
| LYO12927_FRA_02 | Throat                  | France | Lyon            | 2002 | 1D | VP1 | Capsid protein | 849 | HF948156 |
| LYO15602_FRA_02 | Throat                  | France | Lyon            | 2002 | 1D | VP1 | Capsid protein | 849 | HF948157 |
| LYO15657_FRA_02 | Bronchoalveolar fluid   | France | Lyon            | 2002 | 1D | VP1 | Capsid protein | 849 | HF948158 |
| LYO19265_FRA_02 | Throat                  | France | Lyon            | 2002 | 1D | VP1 | Capsid protein | 849 | HF948159 |
| LYO23348_FRA_02 | Throat                  | France | Lyon            | 2002 | 1D | VP1 | Capsid protein | 849 | HF948160 |
| LYO24141_FRA_02 | Feces                   | France | Lyon            | 2002 | 1D | VP1 | Capsid protein | 849 | HF948161 |
| LYO15534_FRA_03 | Throat                  | France | Lyon            | 2003 | 1D | VP1 | Capsid protein | 849 | HF948162 |
| BOU15762_FRA_03 | Feces                   | France | Bourg-en-Bresse | 2003 | 1D | VP1 | Capsid protein | 849 | HF948163 |
| LYO16564_FRA_03 | Feces                   | France | Lyon            | 2003 | 1D | VP1 | Capsid protein | 849 | HF948164 |
| LYO16796_FRA_03 | Throat                  | France | Lyon            | 2003 | 1D | VP1 | Capsid protein | 849 | HF948165 |
| LYO16878_FRA_03 | Feces                   | France | Lyon            | 2003 | 1D | VP1 | Capsid protein | 849 | HF948166 |
| LYO17064_FRA_03 | Throat                  | France | Lyon            | 2003 | 1D | VP1 | Capsid protein | 849 | HF948167 |
| CHA17693_FRA_03 | Feces                   | France | Chambéry        | 2003 | 1D | VP1 | Capsid protein | 849 | HF948168 |
| LYO24126_FRA_03 | Throat                  | France | Lyon            | 2003 | 1D | VP1 | Capsid protein | 849 | HF948169 |
| LYO25255_FRA_03 | Throat                  | France | Lyon            | 2003 | 1D | VP1 | Capsid protein | 849 | HF948170 |
| NAN392_FRA_03   | Feces                   | France | Nancy           | 2003 | 1D | VP1 | Capsid protein | 849 | HF948171 |
| NAN443_FRA_03   | Feces                   | France | Nancy           | 2003 | 1D | VP1 | Capsid protein | 849 | HF948172 |
| GRE447_FRA_03   | Throat                  | France | Grenoble        | 2003 | 1D | VP1 | Capsid protein | 849 | HF948173 |
| GRE452_FRA_03   | Feces                   | France | Grenoble        | 2003 | 1D | VP1 | Capsid protein | 849 | HF948174 |
| GRE453_FRA_03   | Feces                   | France | Grenoble        | 2003 | 1D | VP1 | Capsid protein | 849 | HF948175 |
| GRE456_FRA_03   | Feces                   | France | Grenoble        | 2003 | 1D | VP1 | Capsid protein | 849 | HF948176 |
| NANC627_FRA_03  | Feces                   | France | Nancy           | 2003 | 1D | VP1 | Capsid protein | 849 | HF948177 |
| NIC715_FRA_03   | Feces                   | France | Nice            | 2003 | 1D | VP1 | Capsid protein | 849 | HF948178 |
| NIC717_FRA_03   | Nasopharyngeal aspirate | France | Nice            | 2003 | 1D | VP1 | Capsid protein | 849 | HF948179 |
| LYO28741_FRA_04 | Throat                  | France | Lyon            | 2004 | 1D | VP1 | Capsid protein | 849 | HF948180 |
| NAN102_FRA_04   | Cerebrospinal fluid     | France | Nancy           | 2004 | 1D | VP1 | Capsid protein | 849 | HF948181 |
| NAN933_FRA_04   | Nasopharyngeal aspirate | France | Nancy           | 2004 | 1D | VP1 | Capsid protein | 849 | HF948182 |
| NAN964_FRA_04   | Nasopharyngeal aspirate | France | Nancy           | 2004 | 1D | VP1 | Capsid protein | 849 | HF948183 |
| NAN965_FRA_04   | Nasopharyngeal aspirate | France | Nancy           | 2004 | 1D | VP1 | Capsid protein | 849 | HF948184 |
| GRE1195_FRA_04  | Feces                   | France | Grenoble        | 2004 | 1D | VP1 | Capsid protein | 849 | HF948185 |
| LYO28405_FRA_06 | Throat                  | France | Lyon            | 2006 | 1D | VP1 | Capsid protein | 849 | HF948186 |
| LYO29122_FRA_06 | Throat                  | France | Lyon            | 2006 | 1D | VP1 | Capsid protein | 849 | HF948187 |
| LYO29186_FRA_06 | Feces                   | France | Lyon            | 2006 | 1D | VP1 | Capsid protein | 849 | HF948188 |
| LYO29325_FRA_06 | Nasopharyngeal aspirate | France | Lyon            | 2006 | 1D | VP1 | Capsid protein | 849 | HF948189 |
| LYO29495_FRA_06 | Throat                  | France | Lyon            | 2006 | 1D | VP1 | Capsid protein | 849 | HF948190 |
| LYO30332_FRA_06 | Feces                   | France | Lyon            | 2006 | 1D | VP1 | Capsid protein | 849 | HF948191 |
| LYO32185_FRA_06 | Feces                   | France | Lyon            | 2006 | 1D | VP1 | Capsid protein | 849 | HF948192 |
| LYO35222_FRA_06 | Feces                   | France | Lyon            | 2006 | 1D | VP1 | Capsid protein | 849 | HF948193 |
| LYO36056_FRA_06 | Expectoration fluid     | France | Lyon            | 2006 | 1D | VP1 | Capsid protein | 849 | HF948194 |
| NAN250_FRA_06   | Nasal swab              | France | Nancy           | 2006 | 1D | VP1 | Capsid protein | 849 | HF948195 |
| BRE280_FRA_06   | Bronchial aspirate      | France | Brest           | 2006 | 1D | VP1 | Capsid protein | 849 | HF948196 |
| REN323_FRA_06   | Feces                   | France | Rennes          | 2006 | 1D | VP1 | Capsid protein | 849 | HF948197 |
| GRE585_FRA_06   | Feces                   | France | Grenoble        | 2006 | 1D | VP1 | Capsid protein | 849 | HF948198 |
| BRE713_FRA_06   | Feces                   | France | Brest           | 2006 | 1D | VP1 | Capsid protein | 849 | HF948199 |



|                 |                         |         |                |      |    |     |                |     |          |
|-----------------|-------------------------|---------|----------------|------|----|-----|----------------|-----|----------|
| BRE717_FRA_06   | Feces                   | France  | Brest          | 2006 | 1D | VP1 | Capsid protein | 849 | HF948200 |
| BRE719_FRA_06   | Bronchial aspirate      | France  | Brest          | 2006 | 1D | VP1 | Capsid protein | 849 | HF948201 |
| LYO41112_FRA_07 | Throat                  | France  | Lyon           | 2007 | 1D | VP1 | Capsid protein | 849 | HF948202 |
| GRE753_FRA_08   | Respiratory specimen    | France  | Grenoble       | 2008 | 1D | VP1 | Capsid protein | 849 | HF948203 |
| LYO19441_FRA_09 | Nasopharyngeal aspirate | France  | Lyon           | 2009 | 1D | VP1 | Capsid protein | 849 | HF948204 |
| LYO25559_FRA_09 | Nasopharyngeal aspirate | France  | Lyon           | 2009 | 1D | VP1 | Capsid protein | 849 | HF948205 |
| LYO26495_FRA_09 | Nasopharyngeal aspirate | France  | Lyon           | 2009 | 1D | VP1 | Capsid protein | 849 | HF948206 |
| LYO29001_FRA_09 | Feces                   | France  | Lyon           | 2009 | 1D | VP1 | Capsid protein | 849 | HF948207 |
| LYO29093_FRA_09 | Throat                  | France  | Lyon           | 2009 | 1D | VP1 | Capsid protein | 849 | HF948208 |
| LYO29135_FRA_09 | Feces                   | France  | Lyon           | 2009 | 1D | VP1 | Capsid protein | 849 | HF948209 |
| LYO30235_FRA_09 | Feces                   | France  | Lyon           | 2009 | 1D | VP1 | Capsid protein | 849 | HF948210 |
| LYO48863_FRA_09 | Throat                  | France  | Lyon           | 2009 | 1D | VP1 | Capsid protein | 849 | HF948211 |
| ANG217_FRA_09   | Cerebrospinal fluid     | France  | Anger          | 2009 | 1D | VP1 | Capsid protein | 849 | HF948212 |
| GRE272_FRA_09   | Feces                   | France  | Grenoble       | 2009 | 1D | VP1 | Capsid protein | 849 | HF948213 |
| LYO17171_FRA_10 | Throat                  | France  | Lyon           | 2010 | 1D | VP1 | Capsid protein | 849 | HF948214 |
| LYO24098_FRA_10 | Nasopharyngeal aspirate | France  | Lyon           | 2010 | 1D | VP1 | Capsid protein | 849 | HF948215 |
| LYO32107_FRA_10 | Throat                  | France  | Lyon           | 2010 | 1D | VP1 | Capsid protein | 849 | HF948216 |
| ANG10238_FRA_10 | Cerebrospinal fluid     | France  | Anger          | 2010 | 1D | VP1 | Capsid protein | 849 | HF948217 |
| FRAO371_DEU_00  | Feces                   | Germany | Frankfurt/O    | 2000 | 1D | VP1 | Capsid protein | 849 | HF948218 |
| LUDW298_DEU_01  | Feces                   | Germany | Ludwigsfelde   | 2001 | 1D | VP1 | Capsid protein | 849 | HF948219 |
| NORD433_DEU_04  | Cerebrospinal fluid     | Germany | Nordhorn       | 2004 | 1D | VP1 | Capsid protein | 849 | HF948220 |
| ERLA1148_DEU_06 | Feces                   | Germany | Erlangen       | 2006 | 1D | VP1 | Capsid protein | 849 | HF948221 |
| MAGD35_DEU_07   | Cerebrospinal fluid     | Germany | Magdeburg      | 2007 | 1D | VP1 | Capsid protein | 849 | HF948222 |
| ULM387_DEU_09   | Feces                   | Germany | Ulm            | 2009 | 1D | VP1 | Capsid protein | 849 | HF948223 |
| FRAO473_DEU_09  | Feces                   | Germany | Frankfurt/O    | 2009 | 1D | VP1 | Capsid protein | 849 | HF948224 |
| NEUB545_DEU_10  | Feces                   | Germany | Neubrandenburg | 2010 | 1D | VP1 | Capsid protein | 849 | HF948225 |
| LIM001_CYP_96   | Cerebrospinal fluid     | Cyprus  | Limassol       | 1996 | 1D | VP1 | Capsid protein | 849 | HF948226 |
| LIM002_CYP_96   | Cerebrospinal fluid     | Cyprus  | Limassol       | 1996 | 1D | VP1 | Capsid protein | 849 | HF948227 |
| LIM003_CYP_96   | Cerebrospinal fluid     | Cyprus  | Limassol       | 1996 | 1D | VP1 | Capsid protein | 849 | HF948228 |
| LIM004_CYP_96   | Cerebrospinal fluid     | Cyprus  | Limassol       | 1996 | 1D | VP1 | Capsid protein | 849 | HF948229 |
| LIM005_CYP_96   | Cerebrospinal fluid     | Cyprus  | Limassol       | 1996 | 1D | VP1 | Capsid protein | 849 | HF948230 |
| LIM006_CYP_96   | Cerebrospinal fluid     | Cyprus  | Limassol       | 1996 | 1D | VP1 | Capsid protein | 849 | HF948231 |
| LIM007_CYP_96   | Cerebrospinal fluid     | Cyprus  | Limassol       | 1996 | 1D | VP1 | Capsid protein | 849 | HF948232 |
| LIM008_CYP_96   | Cerebrospinal fluid     | Cyprus  | Limassol       | 1996 | 1D | VP1 | Capsid protein | 849 | HF948233 |
| LIM009_CYP_96   | Cerebrospinal fluid     | Cyprus  | Limassol       | 1996 | 1D | VP1 | Capsid protein | 849 | HF948234 |
| LIM010_CYP_96   | Cerebrospinal fluid     | Cyprus  | Limassol       | 1996 | 1D | VP1 | Capsid protein | 849 | HF948235 |
| NIC001_CYP_03   | Cerebrospinal fluid     | Cyprus  | Nicosia        | 2003 | 1D | VP1 | Capsid protein | 849 | HF948236 |
| NIC001_CYP_05   | Cerebrospinal fluid     | Cyprus  | Nicosia        | 2005 | 1D | VP1 | Capsid protein | 849 | HF948237 |
| LIM002_CYP_05   | Cerebrospinal fluid     | Cyprus  | Limassol       | 2005 | 1D | VP1 | Capsid protein | 849 | HF948238 |
| NIC003_CYP_05   | Cerebrospinal fluid     | Cyprus  | Nicosia        | 2005 | 1D | VP1 | Capsid protein | 849 | HF948239 |
| FAM004_CYP_05   | Cerebrospinal fluid     | Cyprus  | Famagusta      | 2005 | 1D | VP1 | Capsid protein | 849 | HF948240 |
| LARN005_CYP_05  | Feces                   | Cyprus  | Larnaca        | 2005 | 1D | VP1 | Capsid protein | 849 | HF948241 |
| NIC006_CYP_05   | Cerebrospinal fluid     | Cyprus  | Nicosia        | 2005 | 1D | VP1 | Capsid protein | 849 | HF948242 |
| NIC007_CYP_05   | Cerebrospinal fluid     | Cyprus  | Nicosia        | 2005 | 1D | VP1 | Capsid protein | 849 | HF948243 |

|                  |                     |         |                  |      |     |              |                                |      |          |
|------------------|---------------------|---------|------------------|------|-----|--------------|--------------------------------|------|----------|
| FAM008_CYP_05    | Cerebrospinal fluid | Cyprus  | Famagusta        | 2005 | 1D  | VP1          | Capsid protein                 | 849  | HF948244 |
| NIC001_CYP_09    | Feces               | Cyprus  | Nicosia          | 2009 | 1D  | VP1          | Capsid protein                 | 849  | HF948245 |
| NIC002_CYP_09    | Cerebrospinal fluid | Cyprus  | Nicosia          | 2009 | 1D  | VP1          | Capsid protein                 | 849  | HF948246 |
| LIM001_CYP_10    | Feces               | Cyprus  | Limassol         | 2010 | 1D  | VP1          | Capsid protein                 | 849  | HF948247 |
| COPH35484_DNK_10 | Feces               | Denmark | Copenhagen       | 2010 | 1D  | VP1          | Capsid protein                 | 849  | HF948248 |
| COPH37074_DNK_10 | Feces               | Denmark | Copenhagen       | 2010 | 1D  | VP1          | Capsid protein                 | 849  | HF948249 |
| COPM60676_DNK_10 | Feces               | Denmark | Copenhagen       | 2010 | 1D  | VP1          | Capsid protein                 | 849  | HF948250 |
| COPW39429_DNK_09 | Feces               | Denmark | Copenhagen       | 2009 | 1D  | VP1          | Capsid protein                 | 849  | HF948251 |
| COPH51541_DNK_09 | Feces               | Denmark | Copenhagen       | 2009 | 1D  | VP1          | Capsid protein                 | 849  | HF948252 |
| COPH53900_DNK_09 | Feces               | Denmark | Copenhagen       | 2009 | 1D  | VP1          | Capsid protein                 | 849  | HF948253 |
| COPW66073_DNK_07 | Feces               | Denmark | Copenhagen       | 2007 | 1D  | VP1          | Capsid protein                 | 849  | HF948254 |
| COPM21004_DNK_06 | Feces               | Denmark | Copenhagen       | 2006 | 1D  | VP1          | Capsid protein                 | 849  | HF948255 |
| COPW25271_DNK_06 | Feces               | Denmark | Copenhagen       | 2006 | 1D  | VP1          | Capsid protein                 | 849  | HF948256 |
| COPM19952_DNK_06 | Feces               | Denmark | Copenhagen       | 2006 | 1D  | VP1          | Capsid protein                 | 849  | HF948257 |
| COPW24823_DNK_06 | Cerebrospinal fluid | Denmark | Copenhagen       | 2006 | 1D  | VP1          | Capsid protein                 | 849  | HF948258 |
| COPM59744_DNK_04 | Cerebrospinal fluid | Denmark | Copenhagen       | 2004 | 1D  | VP1          | Capsid protein                 | 849  | HF948259 |
| COPT38871_DNK_03 | Feces               | Denmark | Copenhagen       | 2003 | 1D  | VP1          | Capsid protein                 | 849  | HF948260 |
| COPF47737_DNK_03 | Cerebrospinal fluid | Denmark | Copenhagen       | 2003 | 1D  | VP1          | Capsid protein                 | 849  | HF948261 |
| COPW55060_DNK_03 | Cerebrospinal fluid | Denmark | Copenhagen       | 2003 | 1D  | VP1          | Capsid protein                 | 849  | HF948262 |
| COPT50075_DNK_03 | Feces               | Denmark | Copenhagen       | 2003 | 1D  | VP1          | Capsid protein                 | 849  | HF948263 |
| COPM29417_DNK_03 | Feces               | Denmark | Copenhagen       | 2003 | 1D  | VP1          | Capsid protein                 | 849  | HF948264 |
| COPW59426_DNK_03 | Feces               | Denmark | Copenhagen       | 2003 | 1D  | VP1          | Capsid protein                 | 849  | HF948265 |
| COPF77563_DNK_02 | Feces               | Denmark | Copenhagen       | 2002 | 1D  | VP1          | Capsid protein                 | 849  | HF948266 |
| COPF77579_DNK_02 | Feces               | Denmark | Copenhagen       | 2002 | 1D  | VP1          | Capsid protein                 | 849  | HF948267 |
| COPT47225_DNK_02 | Feces               | Denmark | Copenhagen       | 2002 | 1D  | VP1          | Capsid protein                 | 849  | HF948268 |
| COPW23632_DNK_02 | Feces               | Denmark | Copenhagen       | 2002 | 1D  | VP1          | Capsid protein                 | 849  | HF948269 |
| COPF14824_DNK_01 | Cerebrospinal fluid | Denmark | Copenhagen       | 2001 | 1D  | VP1          | Capsid protein                 | 849  | HF948270 |
| COPH73456_DNK_01 | Feces               | Denmark | Copenhagen       | 2001 | 1D  | VP1          | Capsid protein                 | 849  | HF948271 |
| COP6425_DNK_00   | Cerebrospinal fluid | Denmark | Copenhagen       | 2000 | 1D  | VP1          | Capsid protein                 | 849  | HF948272 |
| COP9992_DNK_99   | Feces               | Denmark | Copenhagen       | 1999 | 1D  | VP1          | Capsid protein                 | 849  | HF948273 |
| STU82_DEU_05     | Feces               | Germany | Stuttgart        | 2005 | 1D  | VP1          | Capsid protein                 | 849  | HF948274 |
| STU6_DEU_09      | Feces               | Germany | Stuttgart        | 2009 | 1D  | VP1          | Capsid protein                 | 849  | HF948275 |
| STU28_DEU_09     | Feces               | Germany | Stuttgart        | 2009 | 1D  | VP1          | Capsid protein                 | 849  | HF948276 |
| STU29_DEU_09     | Feces               | Germany | Stuttgart        | 2009 | 1D  | VP1          | Capsid protein                 | 849  | HF948277 |
| STU27_DEU_09     | Feces               | Germany | Stuttgart        | 2009 | 1D  | VP1          | Capsid protein                 | 849  | HF948278 |
| VIE137_AUT_09    |                     | Austria | Vienna           | 2009 | 1D  | VP1          | Capsid protein                 | 849  | HF948279 |
| CF641_FRA_79     | Feces               | France  | Clermont-Ferrand | 1979 | 3CD | 3Cpro; 3Dpol | 3C protease; 3D RNA polymerase | 1035 | HF948280 |
| CF991P_FRA_99    | Throat              | France  | Clermont-Ferrand | 1999 | 3CD | 3Cpro; 3Dpol | 3C protease; 3D RNA polymerase | 1035 | HF948281 |
| CF1247P_FRA_99   | Throat              | France  | Clermont-Ferrand | 1999 | 3CD | 3Cpro; 3Dpol | 3C protease; 3D RNA polymerase | 1035 | HF948282 |
| CF1248P_FRA_99   | Vesicular fluid     | France  | Clermont-Ferrand | 1999 | 3CD | 3Cpro; 3Dpol | 3C protease; 3D RNA polymerase | 1035 | HF948283 |
| CF1399P_FRA_99   | Throat              | France  | Clermont-Ferrand | 1999 | 3CD | 3Cpro; 3Dpol | 3C protease; 3D RNA polymerase | 1035 | HF948284 |
| CF541_FRA_99     | Feces               | France  | Clermont-Ferrand | 1999 | 3CD | 3Cpro; 3Dpol | 3C protease; 3D RNA polymerase | 1035 | HF948285 |
| CF595_FRA_99     | Feces               | France  | Clermont-Ferrand | 1999 | 3CD | 3Cpro; 3Dpol | 3C protease; 3D RNA polymerase | 1035 | HF948286 |
| CF691_FRA_00     | Feces               | France  | Clermont-Ferrand | 2000 | 3CD | 3Cpro; 3Dpol | 3C protease; 3D RNA polymerase | 1035 | HF948287 |

|                    |                       |        |                  |      |     |              |                                |      |          |
|--------------------|-----------------------|--------|------------------|------|-----|--------------|--------------------------------|------|----------|
| CF693_FRA_00       | Feces                 | France | Clermont-Ferrand | 2000 | 3CD | 3Cpro; 3Dpol | 3C protease; 3D RNA polymerase | 1035 | HF948288 |
| CF298054_FRA_02    | Feces                 | France | Clermont-Ferrand | 2002 | 3CD | 3Cpro; 3Dpol | 3C protease; 3D RNA polymerase | 1035 | HF948289 |
| CF301020_FRA_02    | Feces                 | France | Clermont-Ferrand | 2002 | 3CD | 3Cpro; 3Dpol | 3C protease; 3D RNA polymerase | 1035 | HF948290 |
| CF259056_FRA_03    | Feces                 | France | Clermont-Ferrand | 2003 | 3CD | 3Cpro; 3Dpol | 3C protease; 3D RNA polymerase | 1035 | HF948291 |
| CF281038_FRA_03    | Throat                | France | Clermont-Ferrand | 2003 | 3CD | 3Cpro; 3Dpol | 3C protease; 3D RNA polymerase | 1035 | HF948292 |
| CF218022CSF_FRA_05 | Cerebrospinal fluid   | France | Clermont-Ferrand | 2005 | 3CD | 3Cpro; 3Dpol | 3C protease; 3D RNA polymerase | 1035 | HF948293 |
| CF175089CSF_FRA_05 | Cerebrospinal fluid   | France | Clermont-Ferrand | 2005 | 3CD | 3Cpro; 3Dpol | 3C protease; 3D RNA polymerase | 1035 | HF948294 |
| CF164002_FRA_05    | Feces                 | France | Clermont-Ferrand | 2005 | 3CD | 3Cpro; 3Dpol | 3C protease; 3D RNA polymerase | 1035 | HF948295 |
| CF165048_FRA_05    | Feces                 | France | Clermont-Ferrand | 2005 | 3CD | 3Cpro; 3Dpol | 3C protease; 3D RNA polymerase | 1035 | HF948296 |
| CF186106_FRA_05    | Throat                | France | Clermont-Ferrand | 2005 | 3CD | 3Cpro; 3Dpol | 3C protease; 3D RNA polymerase | 1035 | HF948297 |
| CF216024CSF_FRA_06 | Cerebrospinal fluid   | France | Clermont-Ferrand | 2006 | 3CD | 3Cpro; 3Dpol | 3C protease; 3D RNA polymerase | 1035 | HF948298 |
| CF194031CSF_FRA_06 | Cerebrospinal fluid   | France | Clermont-Ferrand | 2006 | 3CD | 3Cpro; 3Dpol | 3C protease; 3D RNA polymerase | 1035 | HF948299 |
| CF193076CSF_FRA_06 | Cerebrospinal fluid   | France | Clermont-Ferrand | 2006 | 3CD | 3Cpro; 3Dpol | 3C protease; 3D RNA polymerase | 1035 | HF948300 |
| CF189004CSF_FRA_06 | Cerebrospinal fluid   | France | Clermont-Ferrand | 2006 | 3CD | 3Cpro; 3Dpol | 3C protease; 3D RNA polymerase | 1035 | HF948301 |
| CF173024CSF_FRA_10 | Cerebrospinal fluid   | France | Clermont-Ferrand | 2010 | 3CD | 3Cpro; 3Dpol | 3C protease; 3D RNA polymerase | 1035 | HF948302 |
| CF184011CSF_FRA_10 | Cerebrospinal fluid   | France | Clermont-Ferrand | 2010 | 3CD | 3Cpro; 3Dpol | 3C protease; 3D RNA polymerase | 1035 | HF948303 |
| CF229007_FRA_10    | Throat                | France | Clermont-Ferrand | 2010 | 3CD | 3Cpro; 3Dpol | 3C protease; 3D RNA polymerase | 1035 | HF948304 |
| CF193012_FRA_11    | Throat                | France | Clermont-Ferrand | 2011 | 3CD | 3Cpro; 3Dpol | 3C protease; 3D RNA polymerase | 1035 | HF948305 |
| VER1233_FRA_10     | Cerebrospinal fluid   | France | Versailles       | 2010 | 3CD | 3Cpro; 3Dpol | 3C protease; 3D RNA polymerase | 1035 | HF948306 |
| LYO10442_FRA_00    | Bronchial aspiration  | France | Lyon             | 2000 | 3CD | 3Cpro; 3Dpol | 3C protease; 3D RNA polymerase | 1035 | HF948307 |
| NAN13764_FRA_00    | Cerebrospinal fluid   | France | Nancy            | 2000 | 3CD | 3Cpro; 3Dpol | 3C protease; 3D RNA polymerase | 1035 | HF948308 |
| NAN13762_FRA_00    | Cerebrospinal fluid   | France | Nancy            | 2000 | 3CD | 3Cpro; 3Dpol | 3C protease; 3D RNA polymerase | 1035 | HF948309 |
| NAN13771_FRA_00    | Cerebrospinal fluid   | France | Nancy            | 2000 | 3CD | 3Cpro; 3Dpol | 3C protease; 3D RNA polymerase | 1035 | HF948310 |
| LIM14928_FRA_00    | Cerebrospinal fluid   | France | Limoge           | 2000 | 3CD | 3Cpro; 3Dpol | 3C protease; 3D RNA polymerase | 1035 | HF948311 |
| AMI986_FRA_00      | Throat                | France | Amiens           | 2000 | 3CD | 3Cpro; 3Dpol | 3C protease; 3D RNA polymerase | 1035 | HF948312 |
| GRE1212_FRA_00     | Feces                 | France | Grenoble         | 2000 | 3CD | 3Cpro; 3Dpol | 3C protease; 3D RNA polymerase | 1035 | HF948313 |
| BES1550_FRA_00     | Throat                | France | Besançon         | 2000 | 3CD | 3Cpro; 3Dpol | 3C protease; 3D RNA polymerase | 1035 | HF948314 |
| LYO17752_FRA_01    | Feces                 | France | Lyon             | 2001 | 3CD | 3Cpro; 3Dpol | 3C protease; 3D RNA polymerase | 1035 | HF948315 |
| LYO18313_FRA_01    | Throat                | France | Lyon             | 2001 | 3CD | 3Cpro; 3Dpol | 3C protease; 3D RNA polymerase | 1035 | HF948316 |
| CRE67_FRA_01       | Cerebrospinal fluid   | France | Créteil          | 2001 | 3CD | 3Cpro; 3Dpol | 3C protease; 3D RNA polymerase | 1035 | HF948317 |
| CRE71_FRA_01       | Cerebrospinal fluid   | France | Créteil          | 2001 | 3CD | 3Cpro; 3Dpol | 3C protease; 3D RNA polymerase | 1035 | HF948318 |
| LYO9553_FRA_02     | Throat                | France | Lyon             | 2002 | 3CD | 3Cpro; 3Dpol | 3C protease; 3D RNA polymerase | 1035 | HF948319 |
| LYO12161_FRA_02    | Throat                | France | Lyon             | 2002 | 3CD | 3Cpro; 3Dpol | 3C protease; 3D RNA polymerase | 1035 | HF948320 |
| LYO12927_FRA_02    | Throat                | France | Lyon             | 2002 | 3CD | 3Cpro; 3Dpol | 3C protease; 3D RNA polymerase | 1035 | HF948321 |
| LYO15602_FRA_02    | Throat                | France | Lyon             | 2002 | 3CD | 3Cpro; 3Dpol | 3C protease; 3D RNA polymerase | 1035 | HF948322 |
| LYO15657_FRA_02    | Bronchoalveolar fluid | France | Lyon             | 2002 | 3CD | 3Cpro; 3Dpol | 3C protease; 3D RNA polymerase | 1035 | HF948323 |
| LYO19265_FRA_02    | Throat                | France | Lyon             | 2002 | 3CD | 3Cpro; 3Dpol | 3C protease; 3D RNA polymerase | 1035 | HF948324 |
| LYO23348_FRA_02    | Throat                | France | Lyon             | 2002 | 3CD | 3Cpro; 3Dpol | 3C protease; 3D RNA polymerase | 1035 | HF948325 |
| LYO24141_FRA_02    | Feces                 | France | Lyon             | 2002 | 3CD | 3Cpro; 3Dpol | 3C protease; 3D RNA polymerase | 1035 | HF948326 |
| LYO15534_FRA_03    | Throat                | France | Lyon             | 2003 | 3CD | 3Cpro; 3Dpol | 3C protease; 3D RNA polymerase | 1035 | HF948327 |
| BOU15762_FRA_03    | Feces                 | France | Bourg-en-Bresse  | 2003 | 3CD | 3Cpro; 3Dpol | 3C protease; 3D RNA polymerase | 1035 | HF948328 |
| LYO16564_FRA_03    | Feces                 | France | Lyon             | 2003 | 3CD | 3Cpro; 3Dpol | 3C protease; 3D RNA polymerase | 1035 | HF948329 |
| LYO16796_FRA_03    | Throat                | France | Lyon             | 2003 | 3CD | 3Cpro; 3Dpol | 3C protease; 3D RNA polymerase | 1035 | HF948330 |
| LYO16878_FRA_03    | Feces                 | France | Lyon             | 2003 | 3CD | 3Cpro; 3Dpol | 3C protease; 3D RNA polymerase | 1035 | HF948331 |

|                 |                         |        |          |      |     |              |                                |      |          |
|-----------------|-------------------------|--------|----------|------|-----|--------------|--------------------------------|------|----------|
| LYO17064_FRA_03 | Throat                  | France | Lyon     | 2003 | 3CD | 3Cpro; 3Dpol | 3C protease; 3D RNA polymerase | 1035 | HF948332 |
| CHA17693_FRA_03 | Feces                   | France | Chambéry | 2003 | 3CD | 3Cpro; 3Dpol | 3C protease; 3D RNA polymerase | 1035 | HF948333 |
| LYO24126_FRA_03 | Throat                  | France | Lyon     | 2003 | 3CD | 3Cpro; 3Dpol | 3C protease; 3D RNA polymerase | 1035 | HF948334 |
| LYO25255_FRA_03 | Throat                  | France | Lyon     | 2003 | 3CD | 3Cpro; 3Dpol | 3C protease; 3D RNA polymerase | 1035 | HF948335 |
| NAN392_FRA_03   | Feces                   | France | Nancy    | 2003 | 3CD | 3Cpro; 3Dpol | 3C protease; 3D RNA polymerase | 1035 | HF948336 |
| NAN443_FRA_03   | Feces                   | France | Nancy    | 2003 | 3CD | 3Cpro; 3Dpol | 3C protease; 3D RNA polymerase | 1035 | HF948337 |
| GRE447_FRA_03   | Throat                  | France | Grenoble | 2003 | 3CD | 3Cpro; 3Dpol | 3C protease; 3D RNA polymerase | 1035 | HF948338 |
| GRE452_FRA_03   | Feces                   | France | Grenoble | 2003 | 3CD | 3Cpro; 3Dpol | 3C protease; 3D RNA polymerase | 1035 | HF948339 |
| GRE453_FRA_03   | Feces                   | France | Grenoble | 2003 | 3CD | 3Cpro; 3Dpol | 3C protease; 3D RNA polymerase | 1035 | HF948340 |
| GRE456_FRA_03   | Feces                   | France | Grenoble | 2003 | 3CD | 3Cpro; 3Dpol | 3C protease; 3D RNA polymerase | 1035 | HF948341 |
| NANC627_FRA_03  | Feces                   | France | Nancy    | 2003 | 3CD | 3Cpro; 3Dpol | 3C protease; 3D RNA polymerase | 1035 | HF948342 |
| NIC715_FRA_03   | Feces                   | France | Nice     | 2003 | 3CD | 3Cpro; 3Dpol | 3C protease; 3D RNA polymerase | 1035 | HF948343 |
| NIC717_FRA_03   | Nasopharyngeal aspirate | France | Nice     | 2003 | 3CD | 3Cpro; 3Dpol | 3C protease; 3D RNA polymerase | 1035 | HF948344 |
| LYO28741_FRA_04 | Throat                  | France | Lyon     | 2004 | 3CD | 3Cpro; 3Dpol | 3C protease; 3D RNA polymerase | 1035 | HF948345 |
| NAN102_FRA_04   | Cerebrospinal fluid     | France | Nancy    | 2004 | 3CD | 3Cpro; 3Dpol | 3C protease; 3D RNA polymerase | 1035 | HF948346 |
| NAN933_FRA_04   | Nasopharyngeal aspirate | France | Nancy    | 2004 | 3CD | 3Cpro; 3Dpol | 3C protease; 3D RNA polymerase | 1035 | HF948347 |
| NAN964_FRA_04   | Nasopharyngeal aspirate | France | Nancy    | 2004 | 3CD | 3Cpro; 3Dpol | 3C protease; 3D RNA polymerase | 1035 | HF948348 |
| NAN965_FRA_04   | Nasopharyngeal aspirate | France | Nancy    | 2004 | 3CD | 3Cpro; 3Dpol | 3C protease; 3D RNA polymerase | 1035 | HF948349 |
| GRE1195_FRA_04  | Feces                   | France | Grenoble | 2004 | 3CD | 3Cpro; 3Dpol | 3C protease; 3D RNA polymerase | 1035 | HF948350 |
| LYO28405_FRA_06 | Throat                  | France | Lyon     | 2006 | 3CD | 3Cpro; 3Dpol | 3C protease; 3D RNA polymerase | 1035 | HF948351 |
| LYO29122_FRA_06 | Throat                  | France | Lyon     | 2006 | 3CD | 3Cpro; 3Dpol | 3C protease; 3D RNA polymerase | 1035 | HF948352 |
| LYO29186_FRA_06 | Feces                   | France | Lyon     | 2006 | 3CD | 3Cpro; 3Dpol | 3C protease; 3D RNA polymerase | 1035 | HF948353 |
| LYO29325_FRA_06 | Nasopharyngeal aspirate | France | Lyon     | 2006 | 3CD | 3Cpro; 3Dpol | 3C protease; 3D RNA polymerase | 1035 | HF948354 |
| LYO29495_FRA_06 | Throat                  | France | Lyon     | 2006 | 3CD | 3Cpro; 3Dpol | 3C protease; 3D RNA polymerase | 1035 | HF948355 |
| LYO30332_FRA_06 | Feces                   | France | Lyon     | 2006 | 3CD | 3Cpro; 3Dpol | 3C protease; 3D RNA polymerase | 1035 | HF948356 |
| LYO32185_FRA_06 | Feces                   | France | Lyon     | 2006 | 3CD | 3Cpro; 3Dpol | 3C protease; 3D RNA polymerase | 1035 | HF948357 |
| LYO35222_FRA_06 | Feces                   | France | Lyon     | 2006 | 3CD | 3Cpro; 3Dpol | 3C protease; 3D RNA polymerase | 1035 | HF948358 |
| LYO36056_FRA_06 | Expectoration fluid     | France | Lyon     | 2006 | 3CD | 3Cpro; 3Dpol | 3C protease; 3D RNA polymerase | 1035 | HF948359 |
| NAN250_FRA_06   | Nasal swab              | France | Nancy    | 2006 | 3CD | 3Cpro; 3Dpol | 3C protease; 3D RNA polymerase | 1035 | HF948360 |
| BRE280_FRA_06   | Bronchial aspirate      | France | Brest    | 2006 | 3CD | 3Cpro; 3Dpol | 3C protease; 3D RNA polymerase | 1035 | HF948361 |
| REN323_FRA_06   | Feces                   | France | Rennes   | 2006 | 3CD | 3Cpro; 3Dpol | 3C protease; 3D RNA polymerase | 1035 | HF948362 |
| GRE585_FRA_06   | Feces                   | France | Grenoble | 2006 | 3CD | 3Cpro; 3Dpol | 3C protease; 3D RNA polymerase | 1035 | HF948363 |
| BRE713_FRA_06   | Feces                   | France | Brest    | 2006 | 3CD | 3Cpro; 3Dpol | 3C protease; 3D RNA polymerase | 1035 | HF948364 |
| BRE717_FRA_06   | Feces                   | France | Brest    | 2006 | 3CD | 3Cpro; 3Dpol | 3C protease; 3D RNA polymerase | 1035 | HF948365 |
| BRE719_FRA_06   | Bronchial aspirate      | France | Brest    | 2006 | 3CD | 3Cpro; 3Dpol | 3C protease; 3D RNA polymerase | 1035 | HF948366 |
| LYO41112_FRA_07 | Throat                  | France | Lyon     | 2007 | 3CD | 3Cpro; 3Dpol | 3C protease; 3D RNA polymerase | 1035 | HF948367 |
| GRE753_FRA_08   | Respiratory specimen    | France | Grenoble | 2008 | 3CD | 3Cpro; 3Dpol | 3C protease; 3D RNA polymerase | 1035 | HF948368 |
| LYO19441_FRA_09 | Nasopharyngeal aspirate | France | Lyon     | 2009 | 3CD | 3Cpro; 3Dpol | 3C protease; 3D RNA polymerase | 1035 | HF948369 |
| LYO25559_FRA_09 | Nasopharyngeal aspirate | France | Lyon     | 2009 | 3CD | 3Cpro; 3Dpol | 3C protease; 3D RNA polymerase | 1035 | HF948370 |
| LYO26495_FRA_09 | Nasopharyngeal aspirate | France | Lyon     | 2009 | 3CD | 3Cpro; 3Dpol | 3C protease; 3D RNA polymerase | 1035 | HF948371 |
| LYO29001_FRA_09 | Feces                   | France | Lyon     | 2009 | 3CD | 3Cpro; 3Dpol | 3C protease; 3D RNA polymerase | 1035 | HF948372 |
| LYO29093_FRA_09 | Throat                  | France | Lyon     | 2009 | 3CD | 3Cpro; 3Dpol | 3C protease; 3D RNA polymerase | 1035 | HF948373 |
| LYO29135_FRA_09 | Feces                   | France | Lyon     | 2009 | 3CD | 3Cpro; 3Dpol | 3C protease; 3D RNA polymerase | 1035 | HF948374 |
| LYO30235_FRA_09 | Feces                   | France | Lyon     | 2009 | 3CD | 3Cpro; 3Dpol | 3C protease; 3D RNA polymerase | 1035 | HF948375 |

|                  |                         |         |                |      |     |              |                                |      |          |
|------------------|-------------------------|---------|----------------|------|-----|--------------|--------------------------------|------|----------|
| LYO48863_FRA_09  | Throat                  | France  | Lyon           | 2009 | 3CD | 3Cpro; 3Dpol | 3C protease; 3D RNA polymerase | 1035 | HF948376 |
| ANG217_FRA_09    | Cerebrospinal fluid     | France  | Anger          | 2009 | 3CD | 3Cpro; 3Dpol | 3C protease; 3D RNA polymerase | 1035 | HF948377 |
| GRE272_FRA_09    | Feces                   | France  | Grenoble       | 2009 | 3CD | 3Cpro; 3Dpol | 3C protease; 3D RNA polymerase | 1035 | HF948378 |
| LYO17171_FRA_10  | Throat                  | France  | Lyon           | 2010 | 3CD | 3Cpro; 3Dpol | 3C protease; 3D RNA polymerase | 1035 | HF948379 |
| LYO24098_FRA_10  | Nasopharyngeal aspirate | France  | Lyon           | 2010 | 3CD | 3Cpro; 3Dpol | 3C protease; 3D RNA polymerase | 1035 | HF948380 |
| LYO32107_FRA_10  | Throat                  | France  | Lyon           | 2010 | 3CD | 3Cpro; 3Dpol | 3C protease; 3D RNA polymerase | 1035 | HF948381 |
| ANG10238_FRA_10  | Cerebrospinal fluid     | France  | Anger          | 2010 | 3CD | 3Cpro; 3Dpol | 3C protease; 3D RNA polymerase | 1035 | HF948382 |
| FRAO371_DEU_00   | Feces                   | Germany | Frankfurt/O    | 2000 | 3CD | 3Cpro; 3Dpol | 3C protease; 3D RNA polymerase | 1035 | HF948383 |
| LUDW298_DEU_01   | Feces                   | Germany | Ludwigsfelde   | 2001 | 3CD | 3Cpro; 3Dpol | 3C protease; 3D RNA polymerase | 1035 | HF948384 |
| NORD433_DEU_04   | Cerebrospinal fluid     | Germany | Nordhorn       | 2004 | 3CD | 3Cpro; 3Dpol | 3C protease; 3D RNA polymerase | 1035 | HF948385 |
| ERLA1148_DEU_06  | Feces                   | Germany | Erlangen       | 2006 | 3CD | 3Cpro; 3Dpol | 3C protease; 3D RNA polymerase | 1035 | HF948386 |
| MAGD35_DEU_07    | Cerebrospinal fluid     | Germany | Magdeburg      | 2007 | 3CD | 3Cpro; 3Dpol | 3C protease; 3D RNA polymerase | 1035 | HF948387 |
| ULM387_DEU_09    | Feces                   | Germany | Ulm            | 2009 | 3CD | 3Cpro; 3Dpol | 3C protease; 3D RNA polymerase | 1035 | HF948388 |
| FRAO473_DEU_09   | Feces                   | Germany | Frankfurt/O    | 2009 | 3CD | 3Cpro; 3Dpol | 3C protease; 3D RNA polymerase | 1035 | HF948389 |
| NEUB545_DEU_10   | Feces                   | Germany | Neubrandenburg | 2010 | 3CD | 3Cpro; 3Dpol | 3C protease; 3D RNA polymerase | 1035 | HF948390 |
| LIM001_CYP_96    | Cerebrospinal fluid     | Cyprus  | Limassol       | 1996 | 3CD | 3Cpro; 3Dpol | 3C protease; 3D RNA polymerase | 1035 | HF948391 |
| LIM002_CYP_96    | Cerebrospinal fluid     | Cyprus  | Limassol       | 1996 | 3CD | 3Cpro; 3Dpol | 3C protease; 3D RNA polymerase | 1035 | HF948392 |
| LIM003_CYP_96    | Cerebrospinal fluid     | Cyprus  | Limassol       | 1996 | 3CD | 3Cpro; 3Dpol | 3C protease; 3D RNA polymerase | 1035 | HF948393 |
| LIM004_CYP_96    | Cerebrospinal fluid     | Cyprus  | Limassol       | 1996 | 3CD | 3Cpro; 3Dpol | 3C protease; 3D RNA polymerase | 1035 | HF948394 |
| LIM005_CYP_96    | Cerebrospinal fluid     | Cyprus  | Limassol       | 1996 | 3CD | 3Cpro; 3Dpol | 3C protease; 3D RNA polymerase | 1035 | HF948395 |
| LIM006_CYP_96    | Cerebrospinal fluid     | Cyprus  | Limassol       | 1996 | 3CD | 3Cpro; 3Dpol | 3C protease; 3D RNA polymerase | 1035 | HF948396 |
| LIM007_CYP_96    | Cerebrospinal fluid     | Cyprus  | Limassol       | 1996 | 3CD | 3Cpro; 3Dpol | 3C protease; 3D RNA polymerase | 1035 | HF948397 |
| LIM008_CYP_96    | Cerebrospinal fluid     | Cyprus  | Limassol       | 1996 | 3CD | 3Cpro; 3Dpol | 3C protease; 3D RNA polymerase | 1035 | HF948398 |
| LIM009_CYP_96    | Cerebrospinal fluid     | Cyprus  | Limassol       | 1996 | 3CD | 3Cpro; 3Dpol | 3C protease; 3D RNA polymerase | 1035 | HF948399 |
| LIM010_CYP_96    | Cerebrospinal fluid     | Cyprus  | Limassol       | 1996 | 3CD | 3Cpro; 3Dpol | 3C protease; 3D RNA polymerase | 1035 | HF948400 |
| NIC001_CYP_03    | Cerebrospinal fluid     | Cyprus  | Nicosia        | 2003 | 3CD | 3Cpro; 3Dpol | 3C protease; 3D RNA polymerase | 1035 | HF948401 |
| NIC001_CYP_05    | Cerebrospinal fluid     | Cyprus  | Nicosia        | 2005 | 3CD | 3Cpro; 3Dpol | 3C protease; 3D RNA polymerase | 1035 | HF948402 |
| LIM002_CYP_05    | Cerebrospinal fluid     | Cyprus  | Limassol       | 2005 | 3CD | 3Cpro; 3Dpol | 3C protease; 3D RNA polymerase | 1035 | HF948403 |
| NIC003_CYP_05    | Cerebrospinal fluid     | Cyprus  | Nicosia        | 2005 | 3CD | 3Cpro; 3Dpol | 3C protease; 3D RNA polymerase | 1035 | HF948404 |
| FAM004_CYP_05    | Cerebrospinal fluid     | Cyprus  | Famagusta      | 2005 | 3CD | 3Cpro; 3Dpol | 3C protease; 3D RNA polymerase | 1035 | HF948405 |
| LARN005_CYP_05   | Feces                   | Cyprus  | Larnaca        | 2005 | 3CD | 3Cpro; 3Dpol | 3C protease; 3D RNA polymerase | 1035 | HF948406 |
| NIC006_CYP_05    | Cerebrospinal fluid     | Cyprus  | Nicosia        | 2005 | 3CD | 3Cpro; 3Dpol | 3C protease; 3D RNA polymerase | 1035 | HF948407 |
| NIC007_CYP_05    | Cerebrospinal fluid     | Cyprus  | Nicosia        | 2005 | 3CD | 3Cpro; 3Dpol | 3C protease; 3D RNA polymerase | 1035 | HF948408 |
| FAM008_CYP_05    | Cerebrospinal fluid     | Cyprus  | Famagusta      | 2005 | 3CD | 3Cpro; 3Dpol | 3C protease; 3D RNA polymerase | 1035 | HF948409 |
| NIC001_CYP_09    | Feces                   | Cyprus  | Nicosia        | 2009 | 3CD | 3Cpro; 3Dpol | 3C protease; 3D RNA polymerase | 1035 | HF948410 |
| NIC002_CYP_09    | Cerebrospinal fluid     | Cyprus  | Nicosia        | 2009 | 3CD | 3Cpro; 3Dpol | 3C protease; 3D RNA polymerase | 1035 | HF948411 |
| LIM001_CYP_10    | Feces                   | Cyprus  | Limassol       | 2010 | 3CD | 3Cpro; 3Dpol | 3C protease; 3D RNA polymerase | 1035 | HF948412 |
| COPH35484_DNK_10 | Feces                   | Denmark | Copenhagen     | 2010 | 3CD | 3Cpro; 3Dpol | 3C protease; 3D RNA polymerase | 1035 | HF948413 |
| COPH37074_DNK_10 | Feces                   | Denmark | Copenhagen     | 2010 | 3CD | 3Cpro; 3Dpol | 3C protease; 3D RNA polymerase | 1035 | HF948414 |
| COPM60676_DNK_10 | Feces                   | Denmark | Copenhagen     | 2010 | 3CD | 3Cpro; 3Dpol | 3C protease; 3D RNA polymerase | 1035 | HF948415 |
| COPW39429_DNK_09 | Feces                   | Denmark | Copenhagen     | 2009 | 3CD | 3Cpro; 3Dpol | 3C protease; 3D RNA polymerase | 1035 | HF948416 |
| COPH51541_DNK_09 | Feces                   | Denmark | Copenhagen     | 2009 | 3CD | 3Cpro; 3Dpol | 3C protease; 3D RNA polymerase | 1035 | HF948417 |
| COPH53900_DNK_09 | Feces                   | Denmark | Copenhagen     | 2009 | 3CD | 3Cpro; 3Dpol | 3C protease; 3D RNA polymerase | 1035 | HF948418 |
| COPW66073_DNK_07 | Feces                   | Denmark | Copenhagen     | 2007 | 3CD | 3Cpro; 3Dpol | 3C protease; 3D RNA polymerase | 1035 | HF948419 |

|                    |                     |         |                  |      |                                |                                          |                                             |      |          |
|--------------------|---------------------|---------|------------------|------|--------------------------------|------------------------------------------|---------------------------------------------|------|----------|
| COPM21004_DNK_06   | Feces               | Denmark | Copenhagen       | 2006 | 3CD                            | 3Cpro; 3Dpol                             | 3C protease; 3D RNA polymerase              | 1035 | HF948420 |
| COPW25271_DNK_06   | Feces               | Denmark | Copenhagen       | 2006 | 3CD                            | 3Cpro; 3Dpol                             | 3C protease; 3D RNA polymerase              | 1035 | HF948421 |
| COPM19952_DNK_06   | Feces               | Denmark | Copenhagen       | 2006 | 3CD                            | 3Cpro; 3Dpol                             | 3C protease; 3D RNA polymerase              | 1035 | HF948422 |
| COPW24823_DNK_06   | Cerebrospinal fluid | Denmark | Copenhagen       | 2006 | 3CD                            | 3Cpro; 3Dpol                             | 3C protease; 3D RNA polymerase              | 1035 | HF948423 |
| COPM59744_DNK_04   | Cerebrospinal fluid | Denmark | Copenhagen       | 2004 | 3CD                            | 3Cpro; 3Dpol                             | 3C protease; 3D RNA polymerase              | 1035 | HF948424 |
| COPT38871_DNK_03   | Feces               | Denmark | Copenhagen       | 2003 | 3CD                            | 3Cpro; 3Dpol                             | 3C protease; 3D RNA polymerase              | 1035 | HF948425 |
| COPF47737_DNK_03   | Cerebrospinal fluid | Denmark | Copenhagen       | 2003 | 3CD                            | 3Cpro; 3Dpol                             | 3C protease; 3D RNA polymerase              | 1035 | HF948426 |
| COPW55060_DNK_03   | Cerebrospinal fluid | Denmark | Copenhagen       | 2003 | 3CD                            | 3Cpro; 3Dpol                             | 3C protease; 3D RNA polymerase              | 1035 | HF948427 |
| COPT50075_DNK_03   | Feces               | Denmark | Copenhagen       | 2003 | 3CD                            | 3Cpro; 3Dpol                             | 3C protease; 3D RNA polymerase              | 1035 | HF948428 |
| COPM29417_DNK_03   | Feces               | Denmark | Copenhagen       | 2003 | 3CD                            | 3Cpro; 3Dpol                             | 3C protease; 3D RNA polymerase              | 1035 | HF948429 |
| COPw59426_DNK_03   | Feces               | Denmark | Copenhagen       | 2003 | 3CD                            | 3Cpro; 3Dpol                             | 3C protease; 3D RNA polymerase              | 1035 | HF948430 |
| COPF77563_DNK_02   | Feces               | Denmark | Copenhagen       | 2002 | 3CD                            | 3Cpro; 3Dpol                             | 3C protease; 3D RNA polymerase              | 1035 | HF948431 |
| COPF77579_DNK_02   | Feces               | Denmark | Copenhagen       | 2002 | 3CD                            | 3Cpro; 3Dpol                             | 3C protease; 3D RNA polymerase              | 1035 | HF948432 |
| COPT47225_DNK_02   | Feces               | Denmark | Copenhagen       | 2002 | 3CD                            | 3Cpro; 3Dpol                             | 3C protease; 3D RNA polymerase              | 1035 | HF948433 |
| COPW23632_DNK_02   | Feces               | Denmark | Copenhagen       | 2002 | 3CD                            | 3Cpro; 3Dpol                             | 3C protease; 3D RNA polymerase              | 1035 | HF948434 |
| COPF14824_DNK_01   | Cerebrospinal fluid | Denmark | Copenhagen       | 2001 | 3CD                            | 3Cpro; 3Dpol                             | 3C protease; 3D RNA polymerase              | 1035 | HF948435 |
| COPH73456_DNK_01   | Feces               | Denmark | Copenhagen       | 2001 | 3CD                            | 3Cpro; 3Dpol                             | 3C protease; 3D RNA polymerase              | 1035 | HF948436 |
| COP6425_DNK_00     | Cerebrospinal fluid | Denmark | Copenhagen       | 2000 | 3CD                            | 3Cpro; 3Dpol                             | 3C protease; 3D RNA polymerase              | 1035 | HF948437 |
| COP9992_DNK_99     | Feces               | Denmark | Copenhagen       | 1999 | 3CD                            | 3Cpro; 3Dpol                             | 3C protease; 3D RNA polymerase              | 1035 | HF948438 |
| STU82_DEU_05       | Feces               | Germany | Stuttgart        | 2005 | 3CD                            | 3Cpro; 3Dpol                             | 3C protease; 3D RNA polymerase              | 1035 | HF948439 |
| STU6_DEU_09        | Feces               | Germany | Stuttgart        | 2009 | 3CD                            | 3Cpro; 3Dpol                             | 3C protease; 3D RNA polymerase              | 1035 | HF948440 |
| STU28_DEU_09       | Feces               | Germany | Stuttgart        | 2009 | 3CD                            | 3Cpro; 3Dpol                             | 3C protease; 3D RNA polymerase              | 1035 | HF948441 |
| STU29_DEU_09       | Feces               | Germany | Stuttgart        | 2009 | 3CD                            | 3Cpro; 3Dpol                             | 3C protease; 3D RNA polymerase              | 1035 | HF948442 |
| STU27_DEU_09       | Feces               | Germany | Stuttgart        | 2009 | 3CD                            | 3Cpro; 3Dpol                             | 3C protease; 3D RNA polymerase              | 1035 | HF948443 |
| VIE137_AUT_09      |                     | Austria | Vienna           | 2009 | 3CD                            | 3Cpro; 3Dpol                             | 3C protease; 3D RNA polymerase              | 1035 | HF948444 |
| CF807S_FRA_77      | Feces               | France  | Clermont-Ferrand | 1977 | 1D; 2A; 2B; 2C; 3A; 3B; 3C; 3D | VP1; 2Apro; 2B; 2C; 3A; 3B; 3Cpro; 3Dpol | Capsid protein VP1; Non structural proteins | 4098 | HF948028 |
| CF955S_FRA_78      | Feces               | France  | Clermont-Ferrand | 1978 | 1D; 2A; 2B; 2C; 3A; 3B; 3C; 3D | VP1; 2Apro; 2B; 2C; 3A; 3B; 3Cpro; 3Dpol | Capsid protein VP1; Non structural proteins | 4098 | HF948029 |
| CF688_FRA_93       | Feces               | France  | Clermont-Ferrand | 1993 | 1D; 2A; 2B; 2C; 3A; 3B; 3C; 3D | VP1; 2Apro; 2B; 2C; 3A; 3B; 3Cpro; 3Dpol | Capsid protein VP1; Non structural proteins | 4098 | HF948030 |
| CF2680P_FRA_96     | Throat              | France  | Clermont-Ferrand | 1996 | 1D; 2A; 2B; 2C; 3A; 3B; 3C; 3D | VP1; 2Apro; 2B; 2C; 3A; 3B; 3Cpro; 3Dpol | Capsid protein VP1; Non structural proteins | 4098 | HF948031 |
| CF1107P_FRA_99     | Throat              | France  | Clermont-Ferrand | 1999 | 1D; 2A; 2B; 2C; 3A; 3B; 3C; 3D | VP1; 2Apro; 2B; 2C; 3A; 3B; 3Cpro; 3Dpol | Capsid protein VP1; Non structural proteins | 4098 | HF948032 |
| CF516_FRA_00       | Cerebrospinal fluid | France  | Clermont-Ferrand | 2000 | 1D; 2A; 2B; 2C; 3A; 3B; 3C; 3D | VP1; 2Apro; 2B; 2C; 3A; 3B; 3Cpro; 3Dpol | Capsid protein VP1; Non structural proteins | 4098 | HF948033 |
| CF238048_FRA_05    | Feces               | France  | Clermont-Ferrand | 2005 | 1D; 2A; 2B; 2C; 3A; 3B; 3C; 3D | VP1; 2Apro; 2B; 2C; 3A; 3B; 3Cpro; 3Dpol | Capsid protein VP1; Non structural proteins | 4098 | HF948034 |
| CF147027_FRA_05    | Feces               | France  | Clermont-Ferrand | 2005 | 1D; 2A; 2B; 2C; 3A; 3B; 3C; 3D | VP1; 2Apro; 2B; 2C; 3A; 3B; 3Cpro; 3Dpol | Capsid protein VP1; Non structural proteins | 4098 | HF948035 |
| CF167067_FRA_06    | Throat              | France  | Clermont-Ferrand | 2006 | 1D; 2A; 2B; 2C; 3A; 3B; 3C; 3D | VP1; 2Apro; 2B; 2C; 3A; 3B; 3Cpro; 3Dpol | Capsid protein VP1; Non structural proteins | 4098 | HF948036 |
| CF219051_FRA_06    | Throat              | France  | Clermont-Ferrand | 2006 | 1D; 2A; 2B; 2C; 3A; 3B; 3C; 3D | VP1; 2Apro; 2B; 2C; 3A; 3B; 3Cpro; 3Dpol | Capsid protein VP1; Non structural proteins | 4098 | HF948037 |
| CF202076_FRA_06    | Throat              | France  | Clermont-Ferrand | 2006 | 1D; 2A; 2B; 2C; 3A; 3B; 3C; 3D | VP1; 2Apro; 2B; 2C; 3A; 3B; 3Cpro; 3Dpol | Capsid protein VP1; Non structural proteins | 4098 | HF948038 |
| CF194099CSF_FRA_11 | Cerebrospinal fluid | France  | Clermont-Ferrand | 2011 | 1D; 2A; 2B; 2C; 3A; 3B; 3C; 3D | VP1; 2Apro; 2B; 2C; 3A; 3B; 3Cpro; 3Dpol | Capsid protein VP1; Non structural proteins | 4098 | HF948039 |
| CF199017CSF_FRA_11 | Cerebrospinal fluid | France  | Clermont-Ferrand | 2011 | 1D; 2A; 2B; 2C; 3A; 3B; 3C; 3D | VP1; 2Apro; 2B; 2C; 3A; 3B; 3Cpro; 3Dpol | Capsid protein VP1; Non structural proteins | 4098 | HF948040 |
| GRE222041_FRA_10   | Cerebrospinal fluid | France  | Grenoble         | 2010 | 1D; 2A; 2B; 2C; 3A; 3B; 3C; 3D | VP1; 2Apro; 2B; 2C; 3A; 3B; 3Cpro; 3Dpol | Capsid protein VP1; Non structural proteins | 4098 | HF948041 |
| TOU1942434_FRA_09  | Cerebrospinal fluid | France  | Toulouse         | 2009 | 1D; 2A; 2B; 2C; 3A; 3B; 3C; 3D | VP1; 2Apro; 2B; 2C; 3A; 3B; 3Cpro; 3Dpol | Capsid protein VP1; Non structural proteins | 4098 | HF948042 |
| VER1002_FRA_10     | Cerebrospinal fluid | France  | Versailles       | 2010 | 1D; 2A; 2B; 2C; 3A; 3B; 3C; 3D | VP1; 2Apro; 2B; 2C; 3A; 3B; 3Cpro; 3Dpol | Capsid protein VP1; Non structural proteins | 4098 | HF948043 |
| NAN7982_FRA_00     | Cerebrospinal fluid | France  | Nancy            | 2000 | 1D; 2A; 2B; 2C; 3A; 3B; 3C; 3D | VP1; 2Apro; 2B; 2C; 3A; 3B; 3Cpro; 3Dpol | Capsid protein VP1; Non structural proteins | 4098 | HF948044 |
| BES1020_FRA_00     | Throat              | France  | Besançon         | 2000 | 1D; 2A; 2B; 2C; 3A; 3B; 3C; 3D | VP1; 2Apro; 2B; 2C; 3A; 3B; 3Cpro; 3Dpol | Capsid protein VP1; Non structural proteins | 4098 | HF948045 |
| GRE1022_FRA_01     | Feces               | France  | Grenoble         | 2001 | 1D; 2A; 2B; 2C; 3A; 3B; 3C; 3D | VP1; 2Apro; 2B; 2C; 3A; 3B; 3Cpro; 3Dpol | Capsid protein VP1; Non structural proteins | 4098 | HF948046 |

|                  |                         |         |             |      |                                |                                          |                                             |      |          |
|------------------|-------------------------|---------|-------------|------|--------------------------------|------------------------------------------|---------------------------------------------|------|----------|
| LYO17104_FRA_02  | Feces                   | France  | Lyon        | 2002 | 1D; 2A; 2B; 2C; 3A; 3B; 3C; 3D | VP1; 2Apro; 2B; 2C; 3A; 3B; 3Cpro; 3Dpol | Capsid protein VP1; Non structural proteins | 4098 | HF948047 |
| ANG435_FRA_03    | Feces                   | France  | Anger       | 2003 | 1D; 2A; 2B; 2C; 3A; 3B; 3C; 3D | VP1; 2Apro; 2B; 2C; 3A; 3B; 3Cpro; 3Dpol | Capsid protein VP1; Non structural proteins | 4098 | HF948048 |
| ANG700_FRA_03    | Cerebrospinal fluid     | France  | Anger       | 2003 | 1D; 2A; 2B; 2C; 3A; 3B; 3C; 3D | VP1; 2Apro; 2B; 2C; 3A; 3B; 3Cpro; 3Dpol | Capsid protein VP1; Non structural proteins | 4098 | HF948049 |
| GRE584_FRA_05    | Feces                   | France  | Grenoble    | 2005 | 1D; 2A; 2B; 2C; 3A; 3B; 3C; 3D | VP1; 2Apro; 2B; 2C; 3A; 3B; 3Cpro; 3Dpol | Capsid protein VP1; Non structural proteins | 4098 | HF948050 |
| LYO32230_FRA_06  | Feces                   | France  | Lyon        | 2006 | 1D; 2A; 2B; 2C; 3A; 3B; 3C; 3D | VP1; 2Apro; 2B; 2C; 3A; 3B; 3Cpro; 3Dpol | Capsid protein VP1; Non structural proteins | 4098 | HF948051 |
| BRE712_FRA_06    | Feces                   | France  | Brest       | 2006 | 1D; 2A; 2B; 2C; 3A; 3B; 3C; 3D | VP1; 2Apro; 2B; 2C; 3A; 3B; 3Cpro; 3Dpol | Capsid protein VP1; Non structural proteins | 4098 | HF948052 |
| BRE716_FRA_06    | Feces                   | France  | Brest       | 2006 | 1D; 2A; 2B; 2C; 3A; 3B; 3C; 3D | VP1; 2Apro; 2B; 2C; 3A; 3B; 3Cpro; 3Dpol | Capsid protein VP1; Non structural proteins | 4098 | HF948053 |
| BRE718_FRA_06    | Feces                   | France  | Brest       | 2006 | 1D; 2A; 2B; 2C; 3A; 3B; 3C; 3D | VP1; 2Apro; 2B; 2C; 3A; 3B; 3Cpro; 3Dpol | Capsid protein VP1; Non structural proteins | 4098 | HF948054 |
| BRE722_FRA_06    | Bronchial aspirate      | France  | Brest       | 2006 | 1D; 2A; 2B; 2C; 3A; 3B; 3C; 3D | VP1; 2Apro; 2B; 2C; 3A; 3B; 3Cpro; 3Dpol | Capsid protein VP1; Non structural proteins | 4098 | HF948055 |
| LYO40225_FRA_07  | Nasopharyngeal aspirate | France  | Lyon        | 2007 | 1D; 2A; 2B; 2C; 3A; 3B; 3C; 3D | VP1; 2Apro; 2B; 2C; 3A; 3B; 3Cpro; 3Dpol | Capsid protein VP1; Non structural proteins | 4098 | HF948056 |
| LYO29314_FRA_08  | Nasopharyngeal aspirate | France  | Lyon        | 2008 | 1D; 2A; 2B; 2C; 3A; 3B; 3C; 3D | VP1; 2Apro; 2B; 2C; 3A; 3B; 3Cpro; 3Dpol | Capsid protein VP1; Non structural proteins | 4098 | HF948057 |
| LYO37194_FRA_09  | Throat                  | France  | Lyon        | 2009 | 1D; 2A; 2B; 2C; 3A; 3B; 3C; 3D | VP1; 2Apro; 2B; 2C; 3A; 3B; 3Cpro; 3Dpol | Capsid protein VP1; Non structural proteins | 4098 | HF948058 |
| LYO22159_FRA_10  | Feces                   | France  | Lyon        | 2010 | 1D; 2A; 2B; 2C; 3A; 3B; 3C; 3D | VP1; 2Apro; 2B; 2C; 3A; 3B; 3Cpro; 3Dpol | Capsid protein VP1; Non structural proteins | 4098 | HF948059 |
| FRAO675_DEU_00   | Feces                   | Germany | Frankfurt/O | 2000 | 1D; 2A; 2B; 2C; 3A; 3B; 3C; 3D | VP1; 2Apro; 2B; 2C; 3A; 3B; 3Cpro; 3Dpol | Capsid protein VP1; Non structural proteins | 4098 | HF948060 |
| GELD308_DEU_02   | Feces                   | Germany | Geldern     | 2002 | 1D; 2A; 2B; 2C; 3A; 3B; 3C; 3D | VP1; 2Apro; 2B; 2C; 3A; 3B; 3Cpro; 3Dpol | Capsid protein VP1; Non structural proteins | 4098 | HF948061 |
| BER1109_DEU_06   | Feces                   | Germany | Berlin      | 2006 | 1D; 2A; 2B; 2C; 3A; 3B; 3C; 3D | VP1; 2Apro; 2B; 2C; 3A; 3B; 3Cpro; 3Dpol | Capsid protein VP1; Non structural proteins | 4098 | HF948062 |
| BER395_DEU_08    | Feces                   | Germany | Berlin      | 2008 | 1D; 2A; 2B; 2C; 3A; 3B; 3C; 3D | VP1; 2Apro; 2B; 2C; 3A; 3B; 3Cpro; 3Dpol | Capsid protein VP1; Non structural proteins | 4098 | HF948063 |
| FRAO296_DEU_10   | Feces                   | Germany | Frankfurt/O | 2010 | 1D; 2A; 2B; 2C; 3A; 3B; 3C; 3D | VP1; 2Apro; 2B; 2C; 3A; 3B; 3Cpro; 3Dpol | Capsid protein VP1; Non structural proteins | 4098 | HF948064 |
| BOL36_ITA_08     | Feces                   | Italy   | Bolzano     | 2008 | 1D; 2A; 2B; 2C; 3A; 3B; 3C; 3D | VP1; 2Apro; 2B; 2C; 3A; 3B; 3Cpro; 3Dpol | Capsid protein VP1; Non structural proteins | 4098 | HF948065 |
| BUD4063_HUN_10   |                         | Hungary | Budapest    | 2010 | 1D; 2A; 2B; 2C; 3A; 3B; 3C; 3D | VP1; 2Apro; 2B; 2C; 3A; 3B; 3Cpro; 3Dpol | Capsid protein VP1; Non structural proteins | 4098 | HF948066 |
| COPW48083_DNK_10 | Feces                   | Denmark | Copenhagen  | 2010 | 1D; 2A; 2B; 2C; 3A; 3B; 3C; 3D | VP1; 2Apro; 2B; 2C; 3A; 3B; 3Cpro; 3Dpol | Capsid protein VP1; Non structural proteins | 4098 | HF948067 |
| COPT37127_DNK_10 | Feces                   | Denmark | Copenhagen  | 2010 | 1D; 2A; 2B; 2C; 3A; 3B; 3C; 3D | VP1; 2Apro; 2B; 2C; 3A; 3B; 3Cpro; 3Dpol | Capsid protein VP1; Non structural proteins | 4098 | HF948068 |
| COPT30857_DNK_09 | Feces                   | Denmark | Copenhagen  | 2009 | 1D; 2A; 2B; 2C; 3A; 3B; 3C; 3D | VP1; 2Apro; 2B; 2C; 3A; 3B; 3Cpro; 3Dpol | Capsid protein VP1; Non structural proteins | 4098 | HF948069 |
| COPT11098_DNK_08 | Feces                   | Denmark | Copenhagen  | 2008 | 1D; 2A; 2B; 2C; 3A; 3B; 3C; 3D | VP1; 2Apro; 2B; 2C; 3A; 3B; 3Cpro; 3Dpol | Capsid protein VP1; Non structural proteins | 4098 | HF948070 |
| COPW38391_DNK_07 | Feces                   | Denmark | Copenhagen  | 2007 | 1D; 2A; 2B; 2C; 3A; 3B; 3C; 3D | VP1; 2Apro; 2B; 2C; 3A; 3B; 3Cpro; 3Dpol | Capsid protein VP1; Non structural proteins | 4098 | HF948071 |
| COPH59346_DNK_02 | Feces                   | Denmark | Copenhagen  | 2002 | 1D; 2A; 2B; 2C; 3A; 3B; 3C; 3D | VP1; 2Apro; 2B; 2C; 3A; 3B; 3Cpro; 3Dpol | Capsid protein VP1; Non structural proteins | 4098 | HF948072 |
| COPH17635_DNK_02 | Feces                   | Denmark | Copenhagen  | 2002 | 1D; 2A; 2B; 2C; 3A; 3B; 3C; 3D | VP1; 2Apro; 2B; 2C; 3A; 3B; 3Cpro; 3Dpol | Capsid protein VP1; Non structural proteins | 4098 | HF948073 |
| COPT17544_DNK_01 | Cerebrospinal fluid     | Denmark | Copenhagen  | 2001 | 1D; 2A; 2B; 2C; 3A; 3B; 3C; 3D | VP1; 2Apro; 2B; 2C; 3A; 3B; 3Cpro; 3Dpol | Capsid protein VP1; Non structural proteins | 4098 | HF948074 |
| COPH20441_DNK_01 | Feces                   | Denmark | Copenhagen  | 2001 | 1D; 2A; 2B; 2C; 3A; 3B; 3C; 3D | VP1; 2Apro; 2B; 2C; 3A; 3B; 3Cpro; 3Dpol | Capsid protein VP1; Non structural proteins | 4098 | HF948075 |
| STU107_DEU_04    | Feces                   | Germany | Stuttgart   | 2004 | 1D; 2A; 2B; 2C; 3A; 3B; 3C; 3D | VP1; 2Apro; 2B; 2C; 3A; 3B; 3Cpro; 3Dpol | Capsid protein VP1; Non structural proteins | 4098 | HF948076 |
| STU108_DEU_04    | Feces                   | Germany | Stuttgart   | 2004 | 1D; 2A; 2B; 2C; 3A; 3B; 3C; 3D | VP1; 2Apro; 2B; 2C; 3A; 3B; 3Cpro; 3Dpol | Capsid protein VP1; Non structural proteins | 4098 | HF948077 |
| STU25_DEU_09     | Feces                   | Germany | Stuttgart   | 2009 | 1D; 2A; 2B; 2C; 3A; 3B; 3C; 3D | VP1; 2Apro; 2B; 2C; 3A; 3B; 3Cpro; 3Dpol | Capsid protein VP1; Non structural proteins | 4098 | HF948078 |
| VIE85_AUT_04     |                         | Austria | Vienna      | 2004 | 1D; 2A; 2B; 2C; 3A; 3B; 3C; 3D | VP1; 2Apro; 2B; 2C; 3A; 3B; 3Cpro; 3Dpol | Capsid protein VP1; Non structural proteins | 4098 | HF948079 |
| VIE140_AUT_04    |                         | Austria | Vienna      | 2004 | 1D; 2A; 2B; 2C; 3A; 3B; 3C; 3D | VP1; 2Apro; 2B; 2C; 3A; 3B; 3Cpro; 3Dpol | Capsid protein VP1; Non structural proteins | 4098 | HF948080 |

**TABLE S2** Accession numbers of CVB5 sequences retrieved from the NCBI database, used in this study in phylogenetic analyses of 1D<sup>VP1</sup> and 3CD genes

| No accession | Strain           | Country        | Year | Strain designation |
|--------------|------------------|----------------|------|--------------------|
| AF114383*    | Faulkner         | USA            | 1952 | AF114383_F_52      |
| AY875692*    | 2000/CSF/KOR     | South Korea    | 2000 | AY875692_KOR_00    |
| X67706*      | 1954/85/UK       | United Kingdom | 1954 | X67706_GBR_54      |
| HQ998851*    | COXB5/Henan/2010 | China          | 2010 | Henan_CHN_10       |
| JN580070*    | CVB5/CC10/10     | China          | 2010 | CC10_CHN_10        |
| DQ092797     | Jena 804         | Germany        | 2002 | J804_DEU_02        |
| GU323569     | FRA9602          | France         | 1996 | 9602_FRA_96        |
| GU323570     | 151rom70         | Romania        | 1970 | 151_ROM_70         |
| GU323571     | FRA9610          | France         | 1996 | 9610_FRA_96        |
| GU323572     | 3168dor71        | Dominican Rep. | 1971 | 3168_DOR_71        |
| GU323573     | 2724fin89        | Finland        | 1989 | 2724_FIN_89        |
| GU323574     | 2069kyr89        | Kyrgyzstan     | 1989 | 2069_KYR_89        |
| GU323575     | 5660rus95        | Russia         | 1995 | 5660_RUS_95        |
| GU323576     | 4378fin88        | Finland        | 1988 | 4378_FIN_88        |
| EU604663     | kor05-CVB5-466cn | South Korea    | 2005 | 466cn_KOR_05       |
| GU300033     | 3086             | Finland        | 1986 | 3086_FIN_86        |
| GU300034     | 11857            | Finland        | 1989 | 11857_FIN_89       |
| GU300035     | 2933             | Finland        | 1989 | 2933_FIN_89        |
| GU300036     | 11836            | Finland        | 1989 | 11836_FIN_89       |
| GU300037     | 2174             | Finland        | 1987 | 2174_FIN_87        |
| GU300038     | 47684            | Finland        | 1988 | 47684_FIN_88       |
| GU300039     | 2972             | Finland        | 1989 | 2972_FIN_89        |
| GU300040     | 45905            | Finland        | 1991 | 45905_FIN_91       |
| GU300041     | 6826             | USA            | 1987 | 6826_USA_87        |
| GU300042     | 38641            | Finland        | 1992 | 38641_FIN_92       |
| GU300043     | 1147             | Estonia        | 1987 | 1147_EST_87        |
| GU300044     | 2137             | USA            | 1970 | 2137_USA_70        |
| GU300045     | 39331            | Denmark        | 1975 | 39331_DAN_75       |
| GU300046     | 26102            | Finland        | 1984 | 26102_FIN_84       |
| GU300047     | 33492            | Finland        | 1985 | 33492_FIN_85       |
| GU300048     | 39209            | Denmark        | 1975 | 39209_DAN_75       |
| GU300049     | 9030             | USA            | 1977 | 9030_USA_77        |
| GU300050     | 3939             | USA            | 1982 | 3939_USA_82        |
| GU300051     | 917              | Denmark        | 1982 | 917_DAN_82         |
| GU300052     | 614              | Finland        | 1984 | 614_FIN_84         |
| GU300053     | 4511             | USA            | 1972 | 4511_USA_72        |
| GU300054     | 1041             | Honduras       | 1979 | 1041_HON_79        |
| GU300055     | 6309             | Honduras       | 1985 | 6309_HON_85        |
| GU300056     | 6051             | Ecuador        | 1974 | 6051_ECU_74        |
| GU300057     | 14937            | Netherlands    | 1996 | 14937_NLD_96       |
| GU300058     | 23930            | Netherlands    | 1996 | 23930_NLD_96       |
| GU300059     | 4804             | Kyrgyzstan     | 1992 | 4804_KYR_92        |
| GU300060     | P028             | Pakistan       | 1990 | P028_PAK_90        |
| GU300061     | 5659             | Russia         | 1995 | 5659_RUS_95        |
| GU300062     | 145              | Romania        | 1970 | 145_ROM_70         |
| GU300063     | 17036            | Netherlands    | 1996 | 17036_NLD_96       |
| GU300064     | 13159            | Netherlands    | 1996 | 13159_NLD_96       |
| GU300065     | 18763            | Netherlands    | 1996 | 18763_NLD_96       |



| No accession | Strain                | Country    | Year       | Strain designation |
|--------------|-----------------------|------------|------------|--------------------|
| GQ352398     | W6683/BLR/2007        | Belarussia | 2007       | W6683_BLR_07       |
| GQ352397     | F5675/BLR/2006        | Belarussia | 2006       | F5675_BLR_06       |
| GQ352396     | F5669/BLR/2006        | Belarussia | 2006       | F5669_BLR_06       |
| GQ352395     | W4238/BLR/2005        | Belarussia | 2005       | W4238_BLR_05       |
| GQ352394     | F4053/BLR/2005        | Belarussia | 2005       | F4053_BLR_05       |
| GQ352393     | CSF1841/BLR/2003      | Belarussia | 2003       | CSF1841_BLR_03     |
| GQ352392     | F1290/BLR/2003        | Belarussia | 2003       | F1290_BLR_03       |
| FJ868335     | 4458                  | Australia  | 13/02/1991 | 4458_AUS_91        |
| FJ868334     | 29886                 | Australia  | 16/04/1991 | 29886_AUS_91       |
| FJ868333     | 11219                 | Australia  | 20/02/1991 | 11219_AUS_91       |
| FJ868291     | 44807                 | Australia  | 20/05/1992 | 44807_AUS_92       |
| FJ868290     | 119229                | Australia  | 07/01/1992 | 119229_AUS_92      |
| AY695108     | Zhejiang1202(CSF)     | China      | 2003       | Zhej1202_CHN_03    |
| AY695109     | Zhejiang1302          | China      | 2003       | Zhej1302_CHN_03    |
| AJ004643     | 1603                  | Finland    | 1982       | 1603_FIN_82        |
| GQ329771     | 98388/SD/CHN/1998     | China      | 1998       | 98388_CHN_98       |
| GQ329770     | 02336/SD/CHN/2002     | China      | 2002       | 02336_CHN_02       |
| GQ246516     | YZ081/SD/CHN/2005     | China      | 2005       | YZ081_CHN_05       |
| GQ246515     | YZ032/SD/CHN/2005     | China      | 2005       | YZ032_CHN_05       |
| GQ246514     | YZ076/SD/CHN/2005     | China      | 2005       | YZ076_CHN_05       |
| GQ246513     | YZ072/SD/CHN/2005     | China      | 2005       | YZ072_CHN_05       |
| GQ246512     | YZ058/SD/CHN/2005     | China      | 2005       | YZ058_CHN_05       |
| GQ246511     | YZ056/SD/CHN/2005     | China      | 2005       | YZ056_CHN_05       |
| GQ246510     | YZ053/SD/CHN/2005     | China      | 2005       | YZ053_CHN_05       |
| GQ246509     | YZ042/SD/CHN/2005     | China      | 2005       | YZ042_CHN_05       |
| GQ246508     | YZ041/SD/CHN/2005     | China      | 2005       | YZ041_CHN_05       |
| GQ246507     | YZ009/SD/CHN/2005     | China      | 2005       | YZ009_CHN_05       |
| GQ246506     | YZ003/SD/CHN/2005     | China      | 2005       | YZ003_CHN_05       |
| GU272014     | SD/sewage/090705/2-3H | China      | 05/07/2009 | SD23H_CHN_09       |

\* complete genome

**TABLE S3a Model selection for the CV-B5 1D sequence dataset through comparison of Log<sub>10</sub> Bayes factors.**

| Model combination <sup>a</sup> | ln P(model data) <sup>b</sup> | S.E. <sup>c</sup> | Model combination |            |            |           |         |          |          |         |          |           |           |          |
|--------------------------------|-------------------------------|-------------------|-------------------|------------|------------|-----------|---------|----------|----------|---------|----------|-----------|-----------|----------|
|                                |                               |                   | strict_CS         | strict_EXP | strict_EPN | strict_BS | uced_CS | uced_EXP | uced_EPN | uced_BS | uclid_CS | uclid_EXP | uclid_EPN | uclid_BS |
| strict_CS                      | -17556.06                     | +/- 0.412         | -                 | 0.377      | -0.453     | -1.061    | -39.644 | -39.79   | -39.562  | -42.78  | -26.907  | -27.852   | -26.64    | -29.487  |
| strict_EXP                     | -17556.928                    | +/- 0.468         | -0.377            | -          | -0.83      | -1.438    | -40.021 | -40.166  | -39.939  | -43.157 | -27.284  | -28.229   | -27.017   | -29.864  |
| strict_EPN                     | -17555.017                    | +/- 0.457         | 0.453             | 0.83       | -          | -0.608    | -39.191 | -39.337  | -39.109  | -42.327 | -26.454  | -27.399   | -26.187   | -29.034  |
| strict_BS                      | -17553.616                    | +/- 0.409         | 1.061             | 1.438      | 0.608      | -         | -38.582 | -38.728  | -38.501  | -41.719 | -25.845  | -26.79    | -25.579   | -28.426  |
| uced_CS                        | -17464.777                    | +/- 0.466         | 39.644            | 40.021     | 39.191     | 38.582    | -       | -0.146   | 0.082    | -3.136  | 12.737   | 11.792    | 13.003    | 10.156   |
| uced_EXP                       | -17464.441                    | +/- 0.464         | 39.79             | 40.166     | 39.337     | 38.728    | 0.146   | -        | 0.228    | -2.991  | 12.883   | 11.938    | 13.149    | 10.302   |
| uced_EPN                       | -17464.965                    | +/- 0.452         | 39.562            | 39.936     | 39.109     | 38.501    | -0.082  | -0.228   | -        | -3.218  | 12.655   | 11.71     | 12.922    | 10.075   |
| uced_BS                        | -17457.555                    | +/- 0.504         | 42.78             | 43.157     | 42.327     | 41.719    | 3.136   | 2.991    | 3.218    | -       | 15.873   | 14.928    | 16.14     | 13.293   |
| uclid_CS                       | -17494.105                    | +/- 0.58          | 26.907            | 27.284     | 26.454     | 25.845    | -12.737 | -12.883  | -12.655  | -15.873 | -        | -0.945    | 0.266     | -2.581   |
| uclid_EXP                      | -17491.929                    | +/- 0.477         | 27.852            | 28.229     | 27.399     | 26.79     | -11.792 | -11.938  | -11.71   | -14.928 | 0.945    | -         | 1.212     | -1.635   |
| uclid_EPN                      | -17494.718                    | +/- 0.597         | 26.64             | 27.017     | 26.187     | 25.579    | -13.003 | -13.149  | -12.922  | -16.14  | -0.266   | -1.212    | -         | -2.847   |
| uclid_BS                       | -17488.163                    | +/- 0.438         | 29.487            | 29.864     | 29.034     | 28.426    | -10.156 | -10.302  | -10.075  | -13.293 | 2.581    | 1.635     | 2.847     | -        |

**TABLE S3b Model selection for the CV-B5 genogroup A\_1D sequence subset through comparison of Log<sub>10</sub> Bayes factors.**

| Model combination <sup>a</sup> | ln P(model data) <sup>b</sup> | S.E. <sup>c</sup> | Model combination |            |            |           |         |          |          |         |          |           |           |          |
|--------------------------------|-------------------------------|-------------------|-------------------|------------|------------|-----------|---------|----------|----------|---------|----------|-----------|-----------|----------|
|                                |                               |                   | strict_CS         | strict_EXP | strict_EPN | strict_BS | uced_CS | uced_EXP | uced_EPN | uced_BS | uclid_CS | uclid_EXP | uclid_EPN | uclid_BS |
| strict_CS                      | -8059.597                     | +/- 0.255         | -                 | -0.082     | -0.139     | -0.153    | -9.533  | -10.084  | -9.955   | -14.324 | -5.91    | -6.129    | -6.079    | -9.42    |
| strict_EXP                     | -8059.407                     | +/- 0.258         | 0.082             | -          | -0.056     | -0.071    | -9.451  | -10.002  | -9.873   | -14.242 | -5.828   | -6.047    | -5.997    | -9.338   |
| strict_EPN                     | -8059.277                     | +/- 0.274         | 0.139             | 0.056      | -          | -0.014    | -9.394  | -9.945   | -9.817   | -14.185 | -5.771   | -5.991    | -5.94     | -9.281   |
| strict_BS                      | -8059.244                     | +/- 0.265         | 0.153             | 0.071      | 0.014      | -         | -9.38   | -9.931   | -9.802   | -14.171 | -5.757   | -5.976    | -5.926    | -9.267   |
| uced_CS                        | -8037.646                     | +/- 0.3           | 9.533             | 9.451      | 9.394      | 9.38      | -       | -0.551   | -0.422   | -4.791  | 3.623    | 3.404     | 3.454     | 0.113    |
| uced_EXP                       | -8036.377                     | +/- 0.293         | 10.084            | 10.002     | 9.945      | 9.931     | 0.551   | -        | 0.129    | -4.24   | 4.174    | 3.955     | 4.005     | 0.664    |
| uced_EPN                       | -8036.674                     | +/- 0.316         | 9.955             | 9.873      | 9.817      | 9.802     | 0.422   | -0.129   | -        | -4.369  | 4.045    | 3.826     | 3.876     | 0.535    |
| uced_BS                        | -8026.614                     | +/- 0.302         | 14.324            | 14.242     | 14.185     | 14.171    | 4.791   | 4.24     | 4.369    | -       | 8.414    | 8.195     | 8.245     | 4.904    |
| uclid_CS                       | -8045.988                     | +/- 0.305         | 5.91              | 5.828      | 5.771      | 5.757     | -3.623  | -4.174   | -4.045   | -8.414  | -        | -0.219    | -0.169    | -3.51    |
| uclid_EXP                      | -8045.483                     | +/- 0.301         | 6.129             | 6.047      | 5.991      | 5.976     | -3.404  | -3.955   | -3.826   | -8.195  | 0.219    | -         | 0.05      | -3.291   |
| uclid_EPN                      | -8045.599                     | +/- 0.31          | 6.079             | 5.997      | 5.94       | 5.926     | -3.454  | -4.005   | -3.876   | -8.245  | 0.169    | -0.05     | -         | -3.341   |
| uclid_BS                       | -8037.906                     | +/- 0.272         | 9.42              | 9.338      | 9.281      | 9.267     | -0.113  | -0.664   | -0.535   | -4.904  | 3.51     | 3.291     | 3.341     | -        |

**TABLE S3c Model selection for the CV-B5 genogroup B\_1D sequence subset through comparison of Log<sub>10</sub> Bayes factors.**

| Model combination <sup>a</sup> | ln P(model data) <sup>b</sup> | S.E. <sup>c</sup> | Model combination |            |            |           |         |          |          |         |          |           |           |          |
|--------------------------------|-------------------------------|-------------------|-------------------|------------|------------|-----------|---------|----------|----------|---------|----------|-----------|-----------|----------|
|                                |                               |                   | strict_CS         | strict_EXP | strict_EPN | strict_BS | uced_CS | uced_EXP | uced_EPN | uced_BS | uclid_CS | uclid_EXP | uclid_EPN | uclid_BS |
| <b>strict_CS</b>               | -10283.727                    | +/- 0.31          | -                 | -0.127     | -0.216     | -0.792    | -27.251 | -26.502  | -26.119  | -25.38  | -17.73   | -18.165   | -17.886   | -17.618  |
| <b>strict_EXP</b>              | -10283.434                    | +/- 0.332         | 0.127             | -          | -0.089     | -0.665    | -27.124 | -26.374  | -25.992  | -25.253 | -17.603  | -18.038   | -17.759   | -17.491  |
| <b>strict_EPN</b>              | -10283.23                     | +/- 0.317         | 0.216             | 0.089      | -          | -0.576    | -27.035 | -26.286  | -25.903  | -25.164 | -17.514  | -17.95    | -17.671   | -17.402  |
| <b>strict_BS</b>               | -10281.903                    | +/- 0.295         | 0.792             | 0.665      | 0.576      | -         | -26.459 | -25.71   | -25.327  | -24.588 | -16.938  | -17.373   | -17.094   | -16.826  |
| <b>uced_CS</b>                 | -10222.978                    | +/- 0.373         | 27.251            | 27.124     | 27.035     | 26.459    | -       | 0.75     | 1.132    | 1.871   | 9.521    | 9.086     | 9.365     | 9.633    |
| <b>uced_EXP</b>                | -10222.705                    | +/- 0.357         | 26.502            | 26.374     | 26.286     | 25.71     | -0.75   | -        | 0.383    | 1.122   | 8.772    | 8.336     | 8.615     | 8.884    |
| <b>uced_EPN</b>                | -10223.586                    | +/- 0.386         | 26.119            | 25.992     | 25.903     | 25.327    | -1.132  | -0.383   | -        | 0.739   | 8.389    | 7.953     | 8.232     | 8.501    |
| <b>uced_BS</b>                 | -10225.287                    | +/- 0.403         | 25.38             | 25.253     | 25.164     | 24.588    | -1.871  | -1.122   | -0.739   | -       | 7.65     | 7.215     | 7.493     | 7.762    |
| <b>uclid_CS</b>                | -10242.902                    | +/- 0.35          | 17.73             | 17.603     | 17.514     | 16.938    | -9.521  | -8.772   | -8.389   | -7.65   | -        | -0.435    | -0.157    | 0.112    |
| <b>uclid_EXP</b>               | -10241.899                    | +/- 0.348         | 18.165            | 18.038     | 17.95      | 17.373    | -9.086  | -8.336   | -7.953   | -7.215  | 0.435    | -         | 0.279     | 0.547    |
| <b>uclid_EPN</b>               | -10242.542                    | +/- 0.376         | 17.886            | 17.759     | 17.671     | 17.094    | -9.365  | -8.615   | -8.232   | -7.493  | 0.157    | -0.279    | -         | 0.268    |
| <b>uclid_BS</b>                | -10243.16                     | +/- 0.362         | 17.618            | 17.491     | 17.402     | 16.826    | -9.633  | -8.884   | -8.501   | -7.762  | -0.112   | -0.547    | -0.268    | -        |

**TABLE S3d. Model selection for the CV-B5 3CD sequence dataset through comparison of Log<sub>10</sub> Bayes factors.**

| Model combination <sup>a</sup> | ln P(model data) <sup>b</sup> | S.E. <sup>c</sup> | Model combination |            |            |           |         |          |          |         |         |          |          |         |
|--------------------------------|-------------------------------|-------------------|-------------------|------------|------------|-----------|---------|----------|----------|---------|---------|----------|----------|---------|
|                                |                               |                   | strict_CS         | strict_EXP | strict_EPN | strict_BS | uced_CS | uced_EXP | uced_EPN | uced_BS | uclد_CS | uclد_EXP | uclد_EPN | uclد_BS |
| strict_CS                      | -20501.546                    | +/- 0.56          | -                 | -0.598     | -0.237     | -0.664    | -69.693 | -70.465  | -69.318  | -73.741 | -64.725 | -64.593  | -65.191  | -66.288 |
| strict_EXP                     | -20500.169                    | +/- 0.426         | 0.598             | -          | 0.361      | -0.065    | -69.095 | -69.867  | -68.72   | -73.143 | -64.126 | -63.995  | -64.593  | -65.69  |
| strict_EPN                     | -20501                        | +/- 0.529         | 0.237             | -0.361     | -          | -0.426    | -69.455 | -70.228  | -69.081  | -73.504 | -64.487 | -64.356  | -64.954  | -66.05  |
| strict_BS                      | -20500.018                    | +/- 0.635         | 0.664             | 0.065      | 0.426      | -         | -69.029 | -69.801  | -68.654  | -73.078 | -64.061 | -63.93   | -64.527  | -65.624 |
| uced_CS                        | -20341.073                    | +/- 0.601         | 69.693            | 69.095     | 69.455     | 69.029    | -       | -0.772   | 0.375    | -4.049  | 4.968   | 5.099    | 4.502    | 3.405   |
| uced_EXP                       | -20339.295                    | +/- 0.533         | 70.465            | 69.867     | 70.228     | 69.801    | 0.772   | -        | 1.147    | -3.276  | 5.741   | 5.872    | 5.274    | 4.177   |
| uced_EPN                       | -20341.936                    | +/- 0.616         | 69.318            | 68.72      | 69.081     | 68.654    | -0.375  | -1.147   | -        | -4.423  | 4.594   | 4.725    | 4.127    | 3.03    |
| uced_BS                        | -20331.751                    | +/- 0.553         | 73.741            | 73.143     | 73.504     | 73.078    | 4.049   | 3.276    | 4.423    | -       | 9.017   | 9.148    | 8.55     | 7.454   |
| uclد_CS                        | -20352.513                    | +/- 0.708         | 64.725            | 64.126     | 64.487     | 64.061    | -4.968  | -5.741   | -4.594   | -9.017  | -       | 0.131    | -0.467   | -1.563  |
| uclد_EXP                       | -20352.815                    | +/- 0.614         | 64.593            | 63.995     | 64.356     | 63.93     | -5.099  | -5.872   | -4.725   | -9.148  | -0.131  | -        | -0.598   | -1.694  |
| uclد_EPN                       | -20351.438                    | +/- 0.57          | 65.191            | 64.593     | 64.954     | 64.527    | -4.502  | -5.274   | -4.127   | -8.55   | 0.467   | 0.598    | -        | -1.097  |
| uclد_BS                        | -20348.913                    | +/- 0.636         | 66.288            | 65.69      | 66.05      | 65.624    | -3.405  | -4.177   | -3.03    | -7.454  | 1.563   | 1.694    | 1.097    | -       |

<sup>a</sup> Three molecular clock models (a strict clock and two relaxed models assuming either an exponential distribution (uced) or an uncorrelated lognormal distribution (uclد) of substitution rates) were compared in combination with four models of demographic history, constant size (CS), exponential growth (EXP), expansion growth (EPN) and Bayesian skyline distribution (BS).

<sup>b</sup> To determine which model combination fit the sequence data analyzed, the marginal likelihood (ln P (model|data)) was estimated with the program Tracer 1.5 and a log<sub>10</sub> Bayes factor was calculated for each pair of model combination (combination 1 in row versus combination 2 in column). A log<sub>10</sub> Bayes factor > 5 is substantial evidence and > 10 is strong evidence for the support of model combination 1 over model combination 2.

<sup>c</sup> Standard error for the marginal likelihood.

**TABLE S4 Mean persistence time of CVB5 lineages**

| <b>CVB5 lineage</b> | <b>Sampling features [a]</b> | <b>Divergence time (mean TMRCA) [b]</b> | <b>Last occurrence (calendar year) [c]</b> | <b>Estimated circulation time (years) [d]</b> | <b>Number of CVB5 lineages [e]</b> | <b>Mean persistence time (years) [f]</b> |
|---------------------|------------------------------|-----------------------------------------|--------------------------------------------|-----------------------------------------------|------------------------------------|------------------------------------------|
| <b>A1</b>           | <b>29; E,A</b>               | <b>1988.4 – 1995.3 [1992.4]</b>         | <b>2007</b>                                | <b>11.7 – 18.6</b>                            | <b>1</b>                           | <b>11.7 – 18.6</b>                       |
| <b>A3</b>           | <b>55; E</b>                 | <b>1992.3 – 1995.5 [1994.2]</b>         | <b>2007</b>                                | <b>11.5 – 14.7</b>                            | <b>5</b>                           | <b>2.3 – 2.9</b>                         |
| <b>A4</b>           | <b>31; E,A</b>               | <b>1999.7 – 2001.9 [2001]</b>           | <b>2010</b>                                | <b>8.1 – 10.3</b>                             | <b>4</b>                           | <b>2.0 – 2.6</b>                         |
| <b>B1</b>           | <b>62; E,A</b>               | <b>1977.1 – 1983.3 [1980.4]</b>         | <b>2010</b>                                | <b>26.7 – 32.9</b>                            | <b>3</b>                           | <b>8.9 – 11</b>                          |
| <b>B2</b>           | <b>90; E</b>                 | <b>2001.6 – 2003.6 [2002.2]</b>         | <b>2011</b>                                | <b>7.4 – 9.4</b>                              | <b>6</b>                           | <b>1.2 – 1.6</b>                         |

[a] Number of 1DVP1 sequences within the lineage; geographic origin (abbreviations: E, Europe; A, Asia).

[b] 95% highest probability density (HPD) interval estimated with the 1DVP1 genealogy.

[c] Year of the last occurrence of a virus strain of the lineage within the sample.

[d] Year of the last occurrence minus divergence time.

[e] Total number of recombinant lineages inferred with the 3CD genealogy.

[f] Ratio of the estimated circulation time to the number of recombinant CVB5 lineages.
